# Supplementary material for: Safety and glycemic outcomes of do-it-yourself AndroidAPS hybrid closed-loop system in adults with type 1 diabetes
Source: PubMed Central journal article supplement (PMC8021167; doi:10.1371/journal.pone.0248965), 2021-04-05
Supplement: pone.0248965.s004.pdf [file pone.0248965.s004.pdf]

| Variable    | Descriptive Statistics (Dataset_29.01) |          |          |          |          |                |                |
|-------------|----------------------------------------|----------|----------|----------|----------|----------------|----------------|
|             | Valid N                                | Mean     | Median   | Minimum  | Maximum  | Lower Quartile | Upper Quartile |
| age [years] | 12                                     | 31,33333 | 30,50000 | 22,00000 | 42,00000 | 26,50000       | 37,50000       |

| Variable    | Descriptive Statistics (Dataset_29.01) |
|-------------|----------------------------------------|
|             | Std.Dev.                               |
| age [years] | 6,651498                               |

| Category | Frequency table: sex (m=1) (Dataset_29.01) |                  |          |                    |
|----------|--------------------------------------------|------------------|----------|--------------------|
|          | Count                                      | Cumulative Count | Percent  | Cumulative Percent |
| 0        | 7                                          | 7                | 58,33333 | 58,33333           |
| 1        | 5                                          | 12               | 41,66667 | 100,0000           |
| Missing  | 0                                          | 12               | 0,00000  | 100,0000           |

| Variable                               | Descriptive Statistics (Dataset_29.01) |          |          |          |
|----------------------------------------|----------------------------------------|----------|----------|----------|
|                                        | Valid N                                | Mean     | Median   | Minimum  |
| V0 weight [kg]                         | 12                                     | 70,5333  | 66,8000  | 52,0000  |
| V0 height [cm]                         | 12                                     | 175,8333 | 177,0000 | 160,0000 |
| V0 BMI [kg/m <sup>2</sup> ]            | 12                                     | 22,7583  | 22,2500  | 20,1000  |
| V0 HbA1c [%]                           | 12                                     | 6,8417   | 6,8000   | 6,2000   |
| V0 HbA1c [mmol/l]                      | 12                                     | 51,2794  | 50,8240  | 44,2660  |
| V0 fructosamine [umol/l]               | 11                                     | 351,0000 | 330,0000 | 324,0000 |
| V0 mean sensor glucose 4 weeks [mg/dl] | 12                                     | 153,3333 | 151,5000 | 128,0000 |
| V0 SD sensor glucose 4 weeks [mg/dl]   | 12                                     | 54,8333  | 54,0000  | 36,0000  |
| V0 CV sensor glucose 4 weeks [%]       | 12                                     | 35,6845  | 35,4687  | 28,1250  |
| V0 DDI 4 weeks [U]                     | 12                                     | 43,5592  | 42,3450  | 28,2000  |
| V0 DDI 4 weeks [U/kg b.w.]             | 12                                     | 0,6166   | 0,5884   | 0,5417   |
| V0 time <54 mg/dl 4 weeks [%]          | 12                                     | 0,9108   | 0,2500   | 0,0000   |
| V0 time <70 mg/dl 4 weeks [%]          | 12                                     | 3,3183   | 2,5000   | 0,0000   |
| V0 time 70-180 mg/dl 4 weeks [%]       | 12                                     | 68,0433  | 62,8350  | 53,5000  |
| V0 time 70-140 mg/dl 4 weeks [%]       | 12                                     | 43,3925  | 35,0550  | 30,5000  |
| V0 time >180 mg/dl 4 weeks [%]         | 12                                     | 28,6383  | 32,0800  | 8,2500   |

| Variable                    | Descriptive Statistics (Dataset_29.01) |                |                |          |
|-----------------------------|----------------------------------------|----------------|----------------|----------|
|                             | Maximum                                | Lower Quartile | Upper Quartile | Std.Dev. |
| V0 weight [kg]              | 99,5000                                | 64,4000        | 75,5000        | 11,77751 |
| V0 height [cm]              | 194,0000                               | 165,5000       | 182,5000       | 11,62156 |
| V0 BMI [kg/m <sup>2</sup> ] | 26,4000                                | 20,7000        | 25,0500        | 2,40282  |
| V0 HbA1c [%]                | 8,0000                                 | 6,5000         | 6,9500         | 0,53676  |
| V0 HbA1c [mmol/l]           | 63,9400                                | 47,5450        | 52,4635        | 5,86673  |

| Variable                               | Descriptive Statistics (Dataset_29.01) |                |                |          |
|----------------------------------------|----------------------------------------|----------------|----------------|----------|
|                                        | Maximum                                | Lower Quartile | Upper Quartile | Std.Dev. |
| V0 fructosamine [umol/l]               | 410,0000                               | 326,0000       | 386,0000       | 31,40701 |
| V0 mean sensor glucose 4 weeks [mg/dl] | 175,0000                               | 136,5000       | 171,0000       | 17,99663 |
| V0 SD sensor glucose 4 weeks [mg/dl]   | 73,0000                                | 47,5000        | 64,0000        | 10,92814 |
| V0 CV sensor glucose 4 weeks [%]       | 44,7368                                | 31,6272        | 38,4376        | 5,35555  |
| V0 DDI 4 weeks [U]                     | 60,4000                                | 37,6800        | 49,3000        | 9,21423  |
| V0 DDI 4 weeks [U/kg b.w.]             | 0,8043                                 | 0,5581         | 0,6570         | 0,07893  |
| V0 time <54 mg/dl 4 weeks [%]          | 4,2500                                 | 0,0000         | 0,9650         | 1,56564  |
| V0 time <70 mg/dl 4 weeks [%]          | 9,5000                                 | 1,2500         | 4,4500         | 2,95004  |
| V0 time 70-180 mg/dl 4 weeks [%]       | 89,5000                                | 57,5000        | 78,6250        | 12,66828 |
| V0 time 70-140 mg/dl 4 weeks [%]       | 65,5000                                | 32,2500        | 56,8000        | 13,78945 |
| V0 time >180 mg/dl 4 weeks [%]         | 43,0000                                | 17,2500        | 39,1250        | 12,52273 |

| Variable                  | Descriptive Statistics (Dataset_29.01) |          |          |          |          |                |
|---------------------------|----------------------------------------|----------|----------|----------|----------|----------------|
|                           | Valid N                                | Mean     | Median   | Minimum  | Maximum  | Lower Quartile |
| V3 weight [kg]            | 12                                     | 70,6167  | 66,7500  | 49,2000  | 101,3000 | 65,1000        |
| V3 height [cm]            | 12                                     | 176,0833 | 177,0000 | 160,0000 | 194,0000 | 167,0000       |
| V3 BMI [kg/m2]            | 12                                     | 22,7000  | 22,1000  | 19,0000  | 26,9000  | 20,7000        |
| V3 HbA1c [%]              | 12                                     | 6,5583   | 6,5500   | 6,0000   | 7,3000   | 6,1500         |
| V3 HbA1c [mmol/l]         | 12                                     | 48,1826  | 48,0915  | 42,0800  | 56,2890  | 43,7195        |
| V3 fructosamine [umol/l]  | 12                                     | 327,3333 | 324,5000 | 295,0000 | 387,0000 | 310,0000       |
| V3 SD DDI [U]             | 12                                     | 5,6867   | 5,7500   | 2,9900   | 8,1600   | 3,6300         |
| V3 mean DDI [U]           | 12                                     | 42,3383  | 41,1100  | 20,1100  | 60,2600  | 38,9250        |
| V3 DDI [U/kg b.w.]        | 12                                     | 0,5945   | 0,5960   | 0,4087   | 0,7708   | 0,5502         |
| V3 mean glucose [mg/dl]   | 12                                     | 146,3500 | 146,1500 | 128,0000 | 162,8000 | 135,6000       |
| V3 median glucose [mg/dl] | 12                                     | 138,3333 | 139,5000 | 123,0000 | 154,0000 | 127,5000       |
| V3 SD glucose [mg/dl]     | 12                                     | 49,3417  | 47,8500  | 31,5000  | 70,3000  | 41,6500        |
| V3 CV glucose [%]         | 12                                     | 33,4805  | 32,9942  | 24,6094  | 45,5016  | 29,6616        |
| V3 time 70-180 mg/dl [%]  | 12                                     | 74,4500  | 75,5500  | 58,4000  | 91,9000  | 65,9000        |
| V3 time 70-140 mg/dl [%]  | 12                                     | 49,1750  | 48,3000  | 35,3000  | 66,5000  | 39,6000        |
| V3 time <70 mg/dl [%]     | 12                                     | 2,6083   | 1,8500   | 0,2000   | 9,5000   | 1,0500         |
| V3 time <54 mg/dl [%]     | 12                                     | 0,7000   | 0,2500   | 0,0000   | 3,8000   | 0,0500         |
| V3 time >180 mg/dl [%]    | 12                                     | 22,9167  | 23,0000  | 6,9000   | 33,2000  | 14,5500        |

| Variable                  | Descriptive Statistics (Dataset_29.01) |          |
|---------------------------|----------------------------------------|----------|
|                           | Upper Quartile                         | Std.Dev. |
| V3 weight [kg]            | 75,7500                                | 12,41413 |
| V3 height [cm]            | 182,5000                               | 11,40541 |
| V3 BMI [kg/m2]            | 25,1000                                | 2,59019  |
| V3 HbA1c [%]              | 6,9000                                 | 0,46799  |
| V3 HbA1c [mmol/l]         | 51,9170                                | 5,11514  |
| V3 fructosamine [umol/l]  | 339,5000                               | 24,30987 |
| V3 SD DDI [U]             | 7,6950                                 | 2,02169  |
| V3 mean DDI [U]           | 47,2450                                | 10,77291 |
| V3 DDI [U/kg b.w.]        | 0,6276                                 | 0,09539  |
| V3 mean glucose [mg/dl]   | 156,3500                               | 12,31241 |
| V3 median glucose [mg/dl] | 146,0000                               | 10,80684 |

| Variable                 | Descriptive Statistics<br>(Dataset_29.01) |          |
|--------------------------|-------------------------------------------|----------|
|                          | Upper<br>Quartile                         | Std.Dev. |
| V3 SD glucose [mg/dl]    | 57,3000                                   | 11,32595 |
| V3 CV glucose [%]        | 36,3888                                   | 5,91027  |
| V3 time 70-180 mg/dl [%] | 83,8500                                   | 10,55449 |
| V3 time 70-140 mg/dl [%] | 58,6500                                   | 10,69002 |
| V3 time <70 mg/dl [%]    | 3,0000                                    | 2,58332  |
| V3 time <54 mg/dl [%]    | 0,6000                                    | 1,14970  |
| V3 time >180 mg/dl [%]   | 32,0000                                   | 9,37791  |

| Variable                  | Descriptive Statistics (Dataset_29.01) |          |          |          |          |                   |
|---------------------------|----------------------------------------|----------|----------|----------|----------|-------------------|
|                           | Valid N                                | Mean     | Median   | Minimum  | Maximum  | Lower<br>Quartile |
| V4 weight [kg]            | 12                                     | 71,1417  | 67,9000  | 49,6000  | 101,1000 | 64,9500           |
| V4 height [cm]            | 12                                     | 176,0833 | 177,0000 | 160,0000 | 194,0000 | 167,0000          |
| V4 BMI [kg/m2]            | 12                                     | 22,8500  | 22,2000  | 19,1000  | 26,9000  | 20,7000           |
| V4 HbA1c [%]              | 12                                     | 6,4167   | 6,5000   | 5,8000   | 6,9000   | 6,1500            |
| V4 HbA1c [mmol/l]         | 12                                     | 46,6342  | 47,5450  | 39,8940  | 51,9170  | 43,7195           |
| V4 fructosamine [umol/l]  | 12                                     | 322,0000 | 321,5000 | 285,0000 | 375,0000 | 299,5000          |
| V4 SD DDI [U]             | 12                                     | 6,4133   | 6,0350   | 2,3700   | 12,7300  | 3,8850            |
| V4 mean DDI [U]           | 12                                     | 43,6300  | 42,1200  | 19,0700  | 62,1500  | 39,8850           |
| V4 DDI [U/kg b.w.]        | 12                                     | 0,6070   | 0,6190   | 0,3845   | 0,7993   | 0,5646            |
| V4 mean glucose [mg/dl]   | 12                                     | 143,5833 | 144,6000 | 120,2000 | 158,7000 | 138,6500          |
| V4 median glucose [mg/dl] | 12                                     | 135,1667 | 136,5000 | 114,0000 | 150,0000 | 128,5000          |
| V4 SD glucose [mg/dl]     | 12                                     | 47,3750  | 47,1000  | 30,2000  | 64,4000  | 40,5500           |
| V4 CV glucose [%]         | 12                                     | 32,7311  | 32,8486  | 23,9113  | 41,9817  | 29,0895           |
| V4 time 70-180 mg/dl [%]  | 12                                     | 78,7000  | 78,5000  | 65,1000  | 93,9000  | 72,1500           |
| V4 time 70-140 mg/dl [%]  | 12                                     | 54,2000  | 51,1000  | 37,4000  | 74,5000  | 48,9000           |
| V4 time <70 mg/dl [%]     | 12                                     | 1,9167   | 1,5000   | 0,2000   | 4,2000   | 0,8500            |
| V4 time <54 mg/dl [%]     | 12                                     | 0,5083   | 0,3000   | 0,0000   | 1,5000   | 0,1000            |
| V4 time >180 mg/dl [%]    | 12                                     | 19,3833  | 20,2000  | 4,8000   | 30,7000  | 15,4000           |

| Variable                  | Descriptive Statistics<br>(Dataset_29.01) |          |
|---------------------------|-------------------------------------------|----------|
|                           | Upper<br>Quartile                         | Std.Dev. |
| V4 weight [kg]            | 77,1000                                   | 12,43700 |
| V4 height [cm]            | 182,5000                                  | 11,40541 |
| V4 BMI [kg/m2]            | 25,3500                                   | 2,60995  |
| V4 HbA1c [%]              | 6,6000                                    | 0,34068  |
| V4 HbA1c [mmol/l]         | 48,6380                                   | 3,72360  |
| V4 fructosamine [umol/l]  | 336,5000                                  | 26,06286 |
| V4 SD DDI [U]             | 8,6350                                    | 3,31250  |
| V4 mean DDI [U]           | 48,3700                                   | 11,42098 |
| V4 DDI [U/kg b.w.]        | 0,6419                                    | 0,09997  |
| V4 mean glucose [mg/dl]   | 153,5500                                  | 11,54720 |
| V4 median glucose [mg/dl] | 141,5000                                  | 10,38209 |
| V4 SD glucose [mg/dl]     | 54,3500                                   | 10,52833 |
| V4 CV glucose [%]         | 35,8172                                   | 5,29350  |
| V4 time 70-180 mg/dl [%]  | 83,4000                                   | 8,14203  |

| Variable                 | Descriptive Statistics<br>(Dataset_29.01) |          |
|--------------------------|-------------------------------------------|----------|
|                          | Upper<br>Quartile                         | Std.Dev. |
| V4 time 70-140 mg/dl [%] | 61,1000                                   | 10,83110 |
| V4 time <70 mg/dl [%]    | 2,8500                                    | 1,33949  |
| V4 time <54 mg/dl [%]    | 0,7500                                    | 0,54848  |
| V4 time >180 mg/dl [%]   | 25,5000                                   | 7,71172  |

| Variable                  | Descriptive Statistics (Dataset_29.01) |          |          |          |          |                   |
|---------------------------|----------------------------------------|----------|----------|----------|----------|-------------------|
|                           | Valid N                                | Mean     | Median   | Minimum  | Maximum  | Lower<br>Quartile |
| V5 weight [kg]            | 12                                     | 71,0917  | 68,5000  | 49,6000  | 101,900  | 64,0500           |
| V5 height [cm]            | 12                                     | 176,0833 | 177,0000 | 160,0000 | 194,000  | 167,0000          |
| V5 BMI [kg/m2]            | 12                                     | 22,8333  | 22,2500  | 19,1000  | 27,100   | 20,8000           |
| V5 HbA1c [%]              | 12                                     | 6,3583   | 6,3500   | 5,7000   | 7,000    | 6,1500            |
| V5 HbA1c [mmol/l]         | 12                                     | 45,9966  | 45,9055  | 38,8010  | 53,010   | 43,7195           |
| V5 fructosamine [umol/l]  | 11                                     | 313,5455 | 315,0000 | 285,0000 | 347,0000 | 290,0000          |
| V5 SD DDI [U]             | 12                                     | 6,7308   | 6,4750   | 3,2100   | 10,840   | 4,7450            |
| V5 mean DDI mean [U]      | 12                                     | 43,2858  | 42,3550  | 20,2100  | 62,020   | 35,8800           |
| V5 DDI [U/kg b.w.]        | 12                                     | 0,6009   | 0,6079   | 0,4075   | 0,768    | 0,5445            |
| V5 mean glucose [mg/dl]   | 12                                     | 141,0417 | 141,6500 | 129,3000 | 151,100  | 135,0500          |
| V5 median glucose [mg/dl] | 12                                     | 132,6667 | 133,0000 | 121,0000 | 143,000  | 127,5000          |
| V5 SD glucose [mg/dl]     | 12                                     | 47,4000  | 48,4000  | 35,1000  | 62,600   | 41,1500           |
| V5 CV glucose [%]         | 12                                     | 33,5275  | 32,7261  | 26,5507  | 44,209   | 30,3837           |
| V5 time 70-180 mg/dl [%]  | 12                                     | 79,5333  | 78,2000  | 68,3000  | 88,600   | 75,2500           |
| V5 time 70-140 mg/dl [%]  | 12                                     | 55,3917  | 51,7000  | 48,5000  | 68,400   | 50,1500           |
| V5 time <70 mg/dl [%]     | 12                                     | 2,3083   | 1,6500   | 0,3000   | 8,400    | 1,4000            |
| V5 time <54 mg/dl [%]     | 12                                     | 0,5000   | 0,3500   | 0,0000   | 2,600    | 0,1500            |
| V5 time >180 mg/dl [%]    | 12                                     | 18,1583  | 19,9500  | 8,6000   | 24,400   | 13,2500           |

| Variable                  | Descriptive Statistics<br>(Dataset_29.01) |          |
|---------------------------|-------------------------------------------|----------|
|                           | Upper<br>Quartile                         | Std.Dev. |
| V5 weight [kg]            | 77,8500                                   | 12,8118  |
| V5 height [cm]            | 182,5000                                  | 11,4054  |
| V5 BMI [kg/m2]            | 25,4500                                   | 2,6905   |
| V5 HbA1c [%]              | 6,6000                                    | 0,3704   |
| V5 HbA1c [mmol/l]         | 48,6380                                   | 4,0485   |
| V5 fructosamine [umol/l]  | 322,0000                                  | 20,59303 |
| V5 SD DDI [U]             | 8,4350                                    | 2,5544   |
| V5 mean DDI mean [U]      | 53,4450                                   | 12,1077  |
| V5 DDI [U/kg b.w.]        | 0,6761                                    | 0,0989   |
| V5 mean glucose [mg/dl]   | 147,2500                                  | 7,4729   |
| V5 median glucose [mg/dl] | 140,0000                                  | 7,5959   |
| V5 SD glucose [mg/dl]     | 52,4000                                   | 7,9720   |
| V5 CV glucose [%]         | 36,2139                                   | 4,9335   |
| V5 time 70-180 mg/dl [%]  | 85,2500                                   | 6,3464   |
| V5 time 70-140 mg/dl [%]  | 58,8500                                   | 7,0693   |
| V5 time <70 mg/dl [%]     | 2,5500                                    | 2,1034   |
| V5 time <54 mg/dl [%]     | 0,5500                                    | 0,6980   |

| Variable               | Descriptive Statistics<br>(Dataset_29.01) |          |
|------------------------|-------------------------------------------|----------|
|                        | Upper<br>Quartile                         | Std.Dev. |
| V5 time >180 mg/dl [%] | 23,2000                                   | 5,8082   |

| Variable                  | Descriptive Statistics (Dataset_29.01) |          |          |          |          |                   |
|---------------------------|----------------------------------------|----------|----------|----------|----------|-------------------|
|                           | Valid N                                | Mean     | Median   | Minimum  | Maximum  | Lower<br>Quartile |
| V6 weight [kg]            | 12                                     | 71,3083  | 69,4500  | 49,2000  | 100,1000 | 65,0000           |
| V6 height [cm]            | 12                                     | 176,0833 | 177,0000 | 160,0000 | 194,0000 | 167,0000          |
| V6 BMI [kg/m2]            | 12                                     | 22,9167  | 22,9000  | 19,0000  | 26,6000  | 20,8500           |
| V6 HbA1c [%]              | 12                                     | 6,2917   | 6,3000   | 5,9000   | 7,1000   | 6,0000            |
| V6 HbA1c [mmol/l]         | 12                                     | 45,2679  | 45,3590  | 40,9870  | 54,1030  | 42,0800           |
| V6 fructosamine [umol/l]  | 12                                     | 314,5833 | 315,0000 | 286,0000 | 353,0000 | 296,0000          |
| V6 SD DDI [U]             | 12                                     | 6,8000   | 6,4550   | 2,9500   | 11,1800  | 4,4650            |
| V6 mean DDI [U]           | 12                                     | 43,1525  | 41,5250  | 20,2500  | 62,3200  | 36,2500           |
| V6 DDI [U/kg b.w.]        | 12                                     | 0,5985   | 0,5838   | 0,4116   | 0,7990   | 0,5288            |
| V6 mean glucose [mg/dl]   | 12                                     | 137,6250 | 140,2500 | 123,1000 | 148,6000 | 128,6000          |
| V6 median glucose [mg/dl] | 12                                     | 129,9167 | 131,0000 | 119,0000 | 139,0000 | 122,0000          |
| V6 SD glucose [mg/dl]     | 12                                     | 44,0833  | 44,3500  | 32,7000  | 59,1000  | 39,5000           |
| V6 CV glucose [%]         | 12                                     | 31,9267  | 31,3327  | 26,5638  | 40,8149  | 29,8720           |
| V6 time 70-180 mg/dl [%]  | 12                                     | 82,1000  | 80,9000  | 71,9000  | 91,6000  | 79,0500           |
| V6 time 70-140 mg/dl [%]  | 12                                     | 58,0667  | 56,7000  | 46,6000  | 70,1000  | 52,5000           |
| V6 time <70 mg/dl [%]     | 12                                     | 2,1917   | 1,9000   | 0,2000   | 5,5000   | 1,1000            |
| V6 time <54 mg/dl [%]     | 12                                     | 0,4833   | 0,3000   | 0,0000   | 2,0000   | 0,2000            |
| V6 time >180 mg/dl [%]    | 12                                     | 15,7083  | 17,8000  | 5,2000   | 23,5000  | 10,4000           |

| Variable                  | Descriptive Statistics<br>(Dataset_29.01) |          |
|---------------------------|-------------------------------------------|----------|
|                           | Upper<br>Quartile                         | Std.Dev. |
| V6 weight [kg]            | 78,0000                                   | 12,33564 |
| V6 height [cm]            | 182,5000                                  | 11,40541 |
| V6 BMI [kg/m2]            | 25,4500                                   | 2,64981  |
| V6 HbA1c [%]              | 6,4000                                    | 0,35792  |
| V6 HbA1c [mmol/l]         | 46,4520                                   | 3,91206  |
| V6 fructosamine [umol/l]  | 333,0000                                  | 22,27293 |
| V6 SD DDI [U]             | 9,2500                                    | 2,94220  |
| V6 mean DDI [U]           | 53,3300                                   | 11,77639 |
| V6 DDI [U/kg b.w.]        | 0,6806                                    | 0,10517  |
| V6 mean glucose [mg/dl]   | 144,8500                                  | 8,68658  |
| V6 median glucose [mg/dl] | 137,0000                                  | 7,71608  |
| V6 SD glucose [mg/dl]     | 46,3000                                   | 6,84409  |
| V6 CV glucose [%]         | 32,7253                                   | 3,69521  |
| V6 time 70-180 mg/dl [%]  | 86,4500                                   | 5,63173  |
| V6 time 70-140 mg/dl [%]  | 64,1000                                   | 7,62118  |
| V6 time <70 mg/dl [%]     | 3,0500                                    | 1,50964  |
| V6 time <54 mg/dl [%]     | 0,5500                                    | 0,53908  |
| V6 time >180 mg/dl [%]    | 19,1000                                   | 5,78658  |

| Variable                             | Descriptive Statistics (Dataset_29.01) |          |          |          |          |
|--------------------------------------|----------------------------------------|----------|----------|----------|----------|
|                                      | Valid N                                | Mean     | Median   | Minimum  | Maximum  |
| StudyPeriod weight [kg]              | 12                                     | 71,3083  | 69,4500  | 49,2000  | 100,1000 |
| StudyPeriod height [cm]              | 12                                     | 176,0833 | 177,0000 | 160,0000 | 194,0000 |
| StudyPeriod BMI [kg/m <sup>2</sup> ] | 12                                     | 22,9167  | 22,9000  | 19,0000  | 26,6000  |
| StudyPeriod HbA1c [%]                | 12                                     | 6,2917   | 6,3000   | 5,9000   | 7,1000   |
| StudyPeriod HbA1c [mmol/l]           | 12                                     | 45,2679  | 45,3590  | 40,9870  | 54,1030  |
| StudyPeriod fructosamine [umol/l]    | 12                                     | 314,5833 | 315,0000 | 286,0000 | 353,0000 |
| StudyPeriod SD DDI [U]               | 12                                     | 7,0300   | 7,0750   | 3,0700   | 10,8400  |
| StudyPeriod mean DDI [U]             | 12                                     | 43,5067  | 42,2300  | 20,0000  | 60,9900  |
| StudyPeriod DDI [U/kg b.w.]          | 12                                     | 0,6033   | 0,5973   | 0,4065   | 0,7819   |
| StudyPeriod mean glucose [mg/dl]     | 12                                     | 141,0667 | 144,9000 | 125,5000 | 149,5000 |
| StudyPeriod median glucose [mg/dl]   | 12                                     | 132,5833 | 136,0000 | 118,0000 | 139,0000 |
| StudyPeriod SD glucose [mg/dl]       | 12                                     | 46,9167  | 47,8500  | 33,0000  | 62,7000  |
| StudyPeriod CV glucose [%]           | 12                                     | 33,1094  | 33,2573  | 25,9230  | 42,6821  |
| StudyPeriod time 70-180 mg/dl [%]    | 12                                     | 79,2917  | 78,2500  | 69,0000  | 91,3000  |
| StudyPeriod time 70-140 mg/dl [%]    | 12                                     | 54,3833  | 51,0000  | 46,2000  | 67,7000  |
| StudyPeriod time <70 mg/dl [%]       | 12                                     | 2,2167   | 1,7500   | 0,2000   | 6,2000   |
| StudyPeriod time <54 mg/dl [%]       | 12                                     | 0,5250   | 0,3500   | 0,0000   | 2,1000   |
| StudyPeriod time >180 mg/dl [%]      | 12                                     | 18,4917  | 20,8500  | 6,2000   | 24,8000  |

| Variable                             | Descriptive Statistics (Dataset_29.01) |                |          |
|--------------------------------------|----------------------------------------|----------------|----------|
|                                      | Lower Quartile                         | Upper Quartile | Std.Dev. |
| StudyPeriod weight [kg]              | 65,0000                                | 78,0000        | 12,33564 |
| StudyPeriod height [cm]              | 167,0000                               | 182,5000       | 11,40541 |
| StudyPeriod BMI [kg/m <sup>2</sup> ] | 20,8500                                | 25,4500        | 2,64981  |
| StudyPeriod HbA1c [%]                | 6,0000                                 | 6,4000         | 0,35792  |
| StudyPeriod HbA1c [mmol/l]           | 42,0800                                | 46,4520        | 3,91206  |
| StudyPeriod fructosamine [umol/l]    | 296,0000                               | 333,0000       | 22,27293 |
| StudyPeriod SD DDI [U]               | 4,7100                                 | 9,3300         | 2,56641  |
| StudyPeriod mean DDI [U]             | 37,8900                                | 51,7850        | 11,57765 |
| StudyPeriod DDI [U/kg b.w.]          | 0,5493                                 | 0,6609         | 0,09851  |
| StudyPeriod mean glucose [mg/dl]     | 135,2500                               | 146,6500       | 8,43492  |
| StudyPeriod median glucose [mg/dl]   | 126,5000                               | 139,0000       | 7,27959  |
| StudyPeriod SD glucose [mg/dl]       | 41,1500                                | 51,4500        | 8,11741  |
| StudyPeriod CV glucose [%]           | 30,1091                                | 35,0649        | 4,37171  |
| StudyPeriod time 70-180 mg/dl [%]    | 75,0500                                | 83,6500        | 6,35159  |
| StudyPeriod time 70-140 mg/dl [%]    | 48,8000                                | 61,1000        | 7,49240  |
| StudyPeriod time <70 mg/dl [%]       | 1,5000                                 | 2,8500         | 1,57008  |
| StudyPeriod time <54 mg/dl [%]       | 0,1500                                 | 0,7000         | 0,58016  |
| StudyPeriod time >180 mg/dl [%]      | 14,7500                                | 23,0500        | 6,08597  |

| Variable       | Tests of Normality (Dataset_29.01) |          |         |          |          |
|----------------|------------------------------------|----------|---------|----------|----------|
|                | N                                  | max D    | K-S p   | W        | p        |
| V0 weight [kg] | 12                                 | 0,201247 | p > .20 | 0,899289 | 0,155302 |
| V0 height [cm] | 12                                 | 0,176052 | p > .20 | 0,921819 | 0,301342 |

| Variable                               | Tests of Normality (Dataset_29.01) |          |          |          |          |
|----------------------------------------|------------------------------------|----------|----------|----------|----------|
|                                        | N                                  | max D    | K-S<br>p | W        | p        |
| V0 BMI [kg/m2]                         | 12                                 | 0,228050 | p > .20  | 0,874082 | 0,073643 |
| V0 HbA1c [%]                           | 12                                 | 0,217337 | p > .20  | 0,878714 | 0,084386 |
| V0 HbA1c [mmol/l]                      | 12                                 | 0,217337 | p > .20  | 0,878714 | 0,084386 |
| V0 fructosamine [umol/l]               | 11                                 | 0,201172 | p > .20  | 0,884824 | 0,101075 |
| V0 mean sensor glucose 4 weeks [mg/dl] | 12                                 | 0,158261 | p > .20  | 0,887648 | 0,109898 |
| V0 SD sensor glucose 4 weeks [mg/dl]   | 12                                 | 0,124157 | p > .20  | 0,982390 | 0,991430 |
| V0 CV sensor glucose 4 weeks [%]       | 12                                 | 0,111770 | p > .20  | 0,944184 | 0,554088 |
| V0 DDI 4 weeks [U]                     | 12                                 | 0,202518 | p > .20  | 0,941105 | 0,512521 |
| V0 DDI 4 weeks [U/kg b.w.]             | 12                                 | 0,192426 | p > .20  | 0,861313 | 0,050775 |
| V0 time <54 mg/dl 4 weeks [%]          | 12                                 | 0,394677 | p < ,05  | 0,625780 | 0,000177 |
| V0 time <70 mg/dl 4 weeks [%]          | 12                                 | 0,171846 | p > .20  | 0,897083 | 0,145444 |
| V0 time 70-180 mg/dl 4 weeks [%]       | 12                                 | 0,210888 | p > .20  | 0,892569 | 0,127183 |
| V0 time 70-140 mg/dl 4 weeks [%]       | 12                                 | 0,217337 | p > .20  | 0,878714 | 0,084386 |
| V0 time >180 mg/dl 4 weeks [%]         | 12                                 | 0,201172 | p > .20  | 0,884824 | 0,101075 |

| Variable                  | Tests of Normality (Dataset_29.01) |          |          |          |          |
|---------------------------|------------------------------------|----------|----------|----------|----------|
|                           | N                                  | max D    | K-S<br>p | W        | p        |
| V3 weight [kg]            | 12                                 | 0,201012 | p > .20  | 0,877786 | 0,082110 |
| V3 height [cm]            | 12                                 | 0,183272 | p > .20  | 0,930443 | 0,384834 |
| V3 BMI [kg/m2]            | 12                                 | 0,192129 | p > .20  | 0,939986 | 0,497886 |
| V3 HbA1c [%]              | 12                                 | 0,194735 | p > .20  | 0,911306 | 0,221727 |
| V3 HbA1c [mmol/l]         | 12                                 | 0,194735 | p > .20  | 0,911306 | 0,221727 |
| V3 fructosamine [umol/l]  | 12                                 | 0,217832 | p > .20  | 0,901017 | 0,163486 |
| V3 SD DDI [U]             | 12                                 | 0,195522 | p > .20  | 0,867181 | 0,060193 |
| V3 mean DDI [U]           | 12                                 | 0,186224 | p > .20  | 0,928968 | 0,369297 |
| V3 DDI [U/kg b.w.]        | 12                                 | 0,197014 | p > .20  | 0,949236 | 0,625850 |
| V3 mean glucose [mg/dl]   | 12                                 | 0,162660 | p > .20  | 0,921811 | 0,301270 |
| V3 median glucose [mg/dl] | 12                                 | 0,167066 | p > .20  | 0,925333 | 0,333252 |
| V3 SD glucose [mg/dl]     | 12                                 | 0,122849 | p > .20  | 0,977867 | 0,973709 |
| V3 CV glucose [%]         | 12                                 | 0,154414 | p > .20  | 0,969909 | 0,909848 |
| V3 time 70-180 mg/dl [%]  | 12                                 | 0,199459 | p > .20  | 0,943299 | 0,541947 |
| V3 time 70-140 mg/dl [%]  | 12                                 | 0,147409 | p > .20  | 0,934063 | 0,425176 |
| V3 time <70 mg/dl [%]     | 12                                 | 0,242755 | p > .20  | 0,789687 | 0,007169 |
| V3 time <54 mg/dl [%]     | 12                                 | 0,333333 | p < ,15  | 0,652284 | 0,000304 |
| V3 time >180 mg/dl [%]    | 12                                 | 0,210359 | p > .20  | 0,888313 | 0,112085 |

| Variable          | Tests of Normality (Dataset_29.01) |          |          |          |          |
|-------------------|------------------------------------|----------|----------|----------|----------|
|                   | N                                  | max D    | K-S<br>p | W        | p        |
| V4 weight [kg]    | 12                                 | 0,177788 | p > .20  | 0,905851 | 0,188705 |
| V4 height [cm]    | 12                                 | 0,183272 | p > .20  | 0,930443 | 0,384834 |
| V4 BMI [kg/m2]    | 12                                 | 0,156271 | p > .20  | 0,935687 | 0,444290 |
| V4 HbA1c [%]      | 12                                 | 0,179955 | p > .20  | 0,946267 | 0,583216 |
| V4 HbA1c [mmol/l] | 12                                 | 0,179955 | p > .20  | 0,946267 | 0,583216 |

| Variable                  | Tests of Normality (Dataset_29.01) |          |          |          |          |
|---------------------------|------------------------------------|----------|----------|----------|----------|
|                           | N                                  | max D    | K-S<br>p | W        | p        |
| V4 fructosamine [umol/l]  | 12                                 | 0,134201 | p > .20  | 0,958719 | 0,765394 |
| V4 SD DDI [U]             | 12                                 | 0,166711 | p > .20  | 0,933335 | 0,416802 |
| V4 mean DDI [U]           | 12                                 | 0,180120 | p > .20  | 0,920262 | 0,288089 |
| V4 DDI [U/kg b.w.]        | 12                                 | 0,224395 | p > .20  | 0,920639 | 0,291248 |
| V4 mean glucose [mg/dl]   | 12                                 | 0,174152 | p > .20  | 0,923882 | 0,319731 |
| V4 median glucose [mg/dl] | 12                                 | 0,115321 | p > .20  | 0,972008 | 0,930662 |
| V4 SD glucose [mg/dl]     | 12                                 | 0,222550 | p > .20  | 0,939878 | 0,496499 |
| V4 CV glucose [%]         | 12                                 | 0,196043 | p > .20  | 0,948977 | 0,622083 |
| V4 time 70-180 mg/dl [%]  | 12                                 | 0,120091 | p > .20  | 0,981540 | 0,989043 |
| V4 time 70-140 mg/dl [%]  | 12                                 | 0,195976 | p > .20  | 0,963887 | 0,837541 |
| V4 time <70 mg/dl [%]     | 12                                 | 0,177376 | p > .20  | 0,921577 | 0,299246 |
| V4 time <54 mg/dl [%]     | 12                                 | 0,271706 | p > .20  | 0,819831 | 0,015887 |
| V4 time >180 mg/dl [%]    | 12                                 | 0,152013 | p > .20  | 0,952365 | 0,671775 |

| Variable                  | Tests of Normality (Dataset_29.01) |          |          |          |          |
|---------------------------|------------------------------------|----------|----------|----------|----------|
|                           | N                                  | max D    | K-S<br>p | W        | p        |
| V5 weight [kg]            | 12                                 | 0,169980 | p > .20  | 0,919026 | 0,277949 |
| V5 height [cm]            | 12                                 | 0,183272 | p > .20  | 0,930443 | 0,384834 |
| V5 BMI [kg/m2]            | 12                                 | 0,168861 | p > .20  | 0,932001 | 0,401810 |
| V5 HbA1c [%]              | 12                                 | 0,187431 | p > .20  | 0,972777 | 0,937609 |
| V5 HbA1c [mmol/l]         | 12                                 | 0,187431 | p > .20  | 0,972777 | 0,937609 |
| V5 fructosamine [umol/l]  | 11                                 | 0,173247 | p > .20  | 0,940443 | 0,394834 |
| V5 SD DDI [U]             | 12                                 | 0,194716 | p > .20  | 0,921775 | 0,300956 |
| V5 mean DDI mean [U]      | 12                                 | 0,162246 | p > .20  | 0,968230 | 0,891406 |
| V5 DDI [U/kg b.w.]        | 12                                 | 0,108767 | p > .20  | 0,980139 | 0,984197 |
| V5 mean glucose [mg/dl]   | 12                                 | 0,167428 | p > .20  | 0,906887 | 0,194586 |
| V5 median glucose [mg/dl] | 12                                 | 0,166171 | p > .20  | 0,921123 | 0,295354 |
| V5 SD glucose [mg/dl]     | 12                                 | 0,132577 | p > .20  | 0,972820 | 0,937983 |
| V5 CV glucose [%]         | 12                                 | 0,129339 | p > .20  | 0,955474 | 0,717807 |
| V5 time 70-180 mg/dl [%]  | 12                                 | 0,166536 | p > .20  | 0,928269 | 0,362125 |
| V5 time 70-140 mg/dl [%]  | 12                                 | 0,162256 | p > .20  | 0,969230 | 0,894406 |
| V5 time <70 mg/dl [%]     | 12                                 | 0,251581 | p > .20  | 0,709615 | 0,001045 |
| V5 time <54 mg/dl [%]     | 12                                 | 0,303909 | p < .20  | 0,633414 | 0,000207 |
| V5 time >180 mg/dl [%]    | 12                                 | 0,178766 | p > .20  | 0,867649 | 0,061020 |

| Variable                 | Tests of Normality (Dataset_29.01) |          |          |          |          |
|--------------------------|------------------------------------|----------|----------|----------|----------|
|                          | N                                  | max D    | K-S<br>p | W        | p        |
| V6 weight [kg]           | 12                                 | 0,191182 | p > .20  | 0,925911 | 0,338774 |
| V6 height [cm]           | 12                                 | 0,183272 | p > .20  | 0,930443 | 0,384834 |
| V6 BMI [kg/m2]           | 12                                 | 0,158124 | p > .20  | 0,934570 | 0,431080 |
| V6 HbA1c [%]             | 12                                 | 0,214402 | p > .20  | 0,892890 | 0,128400 |
| V6 HbA1c [mmol/l]        | 12                                 | 0,214402 | p > .20  | 0,892890 | 0,128400 |
| V6 fructosamine [umol/l] | 12                                 | 0,188395 | p > .20  | 0,937596 | 0,467574 |



| Variable                  | Tests of Normality (Dataset_29.01) |          |          |          |          |
|---------------------------|------------------------------------|----------|----------|----------|----------|
|                           | N                                  | max D    | K-S<br>p | W        | p        |
| V6 SD DDI [U]             | 12                                 | 0,176869 | p > .20  | 0,901070 | 0,163745 |
| V6 mean DDI [U]           | 12                                 | 0,130890 | p > .20  | 0,971341 | 0,924333 |
| V6 DDI [U/kg b.w.]        | 12                                 | 0,141964 | p > .20  | 0,982292 | 0,991176 |
| V6 mean glucose [mg/dl]   | 12                                 | 0,173262 | p > .20  | 0,894015 | 0,132768 |
| V6 median glucose [mg/dl] | 12                                 | 0,201434 | p > .20  | 0,875155 | 0,075999 |
| V6 SD glucose [mg/dl]     | 12                                 | 0,184443 | p > .20  | 0,952399 | 0,672276 |
| V6 CV glucose [%]         | 12                                 | 0,209066 | p > .20  | 0,904230 | 0,179849 |
| V6 time 70-180 mg/dl [%]  | 12                                 | 0,146818 | p > .20  | 0,977104 | 0,969413 |
| V6 time 70-140 mg/dl [%]  | 12                                 | 0,175400 | p > .20  | 0,952033 | 0,666874 |
| V6 time <70 mg/dl [%]     | 12                                 | 0,133848 | p > .20  | 0,946532 | 0,586972 |
| V6 time <54 mg/dl [%]     | 12                                 | 0,311426 | p < .20  | 0,729218 | 0,001635 |
| V6 time >180 mg/dl [%]    | 12                                 | 0,185045 | p > .20  | 0,930326 | 0,383580 |

| Variable                             | Tests of Normality (Dataset_29.01) |          |          |          |          |
|--------------------------------------|------------------------------------|----------|----------|----------|----------|
|                                      | N                                  | max D    | K-S<br>p | W        | p        |
| StudyPeriod weight [kg]              | 12                                 | 0,191182 | p > .20  | 0,925911 | 0,338774 |
| StudyPeriod height [cm]              | 12                                 | 0,183272 | p > .20  | 0,930443 | 0,384834 |
| StudyPeriod BMI [kg/m <sup>2</sup> ] | 12                                 | 0,158124 | p > .20  | 0,934570 | 0,431080 |
| StudyPeriod HbA1c [%]                | 12                                 | 0,214402 | p > .20  | 0,892890 | 0,128400 |
| StudyPeriod HbA1c [mmol/l]           | 12                                 | 0,214402 | p > .20  | 0,892890 | 0,128400 |
| StudyPeriod fructosamine [umol/l]    | 12                                 | 0,188395 | p > .20  | 0,937596 | 0,467574 |
| StudyPeriod SD DDI [U]               | 12                                 | 0,143011 | p > .20  | 0,948557 | 0,615993 |
| StudyPeriod mean DDI [U]             | 12                                 | 0,150017 | p > .20  | 0,955860 | 0,723506 |
| StudyPeriod DDI [U/kg b.w.]          | 12                                 | 0,129307 | p > .20  | 0,987204 | 0,998676 |
| StudyPeriod mean glucose [mg/dl]     | 12                                 | 0,188395 | p > .20  | 0,937596 | 0,467574 |
| StudyPeriod median glucose [mg/dl]   | 12                                 | 0,188395 | p > .20  | 0,937596 | 0,467574 |
| StudyPeriod SD glucose [mg/dl]       | 12                                 | 0,101275 | p > .20  | 0,988356 | 0,999288 |
| StudyPeriod CV glucose [%]           | 12                                 | 0,137701 | p > .20  | 0,965040 | 0,852589 |
| StudyPeriod time 70-180 mg/dl [%]    | 12                                 | 0,180737 | p > .20  | 0,941720 | 0,520667 |
| StudyPeriod time 70-140 mg/dl [%]    | 12                                 | 0,196283 | p > .20  | 0,874460 | 0,074465 |
| StudyPeriod time <70 mg/dl [%]       | 12                                 | 0,231096 | p > .20  | 0,851882 | 0,038733 |
| StudyPeriod time <54 mg/dl [%]       | 12                                 | 0,198571 | p > .20  | 0,787377 | 0,006756 |
| StudyPeriod time >180 mg/dl [%]      | 12                                 | 0,183272 | p > .20  | 0,930443 | 0,384834 |

| Effect    | Repeated Measures Analysis of Variance with Effect Sizes and Powers (Dataset_29.01)<br>Sigma-restricted parameterization<br>Effective hypothesis decomposition |                     |          |          |          |                     |
|-----------|----------------------------------------------------------------------------------------------------------------------------------------------------------------|---------------------|----------|----------|----------|---------------------|
|           | SS                                                                                                                                                             | Degr. of<br>Freedom | MS       | F        | p        | Partial eta-squared |
| Intercept | 180554,2                                                                                                                                                       | 1                   | 180554,2 | 409,0054 | 0,000000 | 0,973810            |
| Error     | 4855,9                                                                                                                                                         | 11                  | 441,4    |          |          |                     |
| WEIGHT    | 4,3                                                                                                                                                            | 2                   | 2,2      | 1,2266   | 0,312583 | 0,100321            |
| Error     | 39,0                                                                                                                                                           | 22                  | 1,8      |          |          |                     |

|           |                                                                                                                                                                |                             |
|-----------|----------------------------------------------------------------------------------------------------------------------------------------------------------------|-----------------------------|
| Effect    | Repeated Measures Analysis of Variance with Effect Sizes and Powers (Dataset_29.01)<br>Sigma-restricted parameterization<br>Effective hypothesis decomposition |                             |
|           | Non-centrality                                                                                                                                                 | Observed power (alpha=0,05) |
| Intercept | 409,0054                                                                                                                                                       | 1,000000                    |
| Error     |                                                                                                                                                                |                             |
| WEIGHT    | 2,4532                                                                                                                                                         | 0,239173                    |
| Error     |                                                                                                                                                                |                             |

|          |                                                                                                                                 |              |      |
|----------|---------------------------------------------------------------------------------------------------------------------------------|--------------|------|
| Cell No. | Tukey HSD test; variable DV_1<br>(Dataset_29.01)<br>Homogenous Groups, alpha = ,05000<br>Error: Within MS = 1,7707, df = 22,000 |              |      |
|          | WEIGHT                                                                                                                          | DV_1<br>Mean | 1    |
| 1        | V0 weight [kg]                                                                                                                  | 70,53333     | **** |
| 2        | V3 weight [kg]                                                                                                                  | 70,61667     | **** |
| 3        | StudyPeriod weight [kg]                                                                                                         | 71,30833     | **** |

|        |                                                                                                                    |          |    |          |
|--------|--------------------------------------------------------------------------------------------------------------------|----------|----|----------|
| Effect | Mauchly Sphericity Test (Dataset_29.01)<br>Sigma-restricted parameterization<br>Effective hypothesis decomposition |          |    |          |
|        | W                                                                                                                  | Chi-Sqr. | df | p        |
| WEIGHT | 0,614356                                                                                                           | 4,871804 | 2  | 0,087519 |

|           |                                                                                                                                                                |                     |          |          |          |                     |
|-----------|----------------------------------------------------------------------------------------------------------------------------------------------------------------|---------------------|----------|----------|----------|---------------------|
| Effect    | Repeated Measures Analysis of Variance with Effect Sizes and Powers (Dataset_29.01)<br>Sigma-restricted parameterization<br>Effective hypothesis decomposition |                     |          |          |          |                     |
|           | SS                                                                                                                                                             | Degr. of<br>Freedom | MS       | F        | p        | Partial eta-squared |
| Intercept | 18700,56                                                                                                                                                       | 1                   | 18700,56 | 979,7049 | 0,000000 | 0,988897            |
| Error     | 209,97                                                                                                                                                         | 11                  | 19,09    |          |          |                     |
| BMI       | 0,30                                                                                                                                                           | 2                   | 0,15     | 0,7248   | 0,495637 | 0,061817            |
| Error     | 4,58                                                                                                                                                           | 22                  | 0,21     |          |          |                     |

|           |                                                                                                                                                                |                             |
|-----------|----------------------------------------------------------------------------------------------------------------------------------------------------------------|-----------------------------|
| Effect    | Repeated Measures Analysis of Variance with Effect Sizes and Powers (Dataset_29.01)<br>Sigma-restricted parameterization<br>Effective hypothesis decomposition |                             |
|           | Non-centrality                                                                                                                                                 | Observed power (alpha=0,05) |
| Intercept | 979,7049                                                                                                                                                       | 1,000000                    |
| Error     |                                                                                                                                                                |                             |
| BMI       | 1,4496                                                                                                                                                         | 0,156827                    |

|        |                                                                                                                                                                |                             |
|--------|----------------------------------------------------------------------------------------------------------------------------------------------------------------|-----------------------------|
| Effect | Repeated Measures Analysis of Variance with Effect Sizes and Powers (Dataset_29.01)<br>Sigma-restricted parameterization<br>Effective hypothesis decomposition |                             |
|        | Non-centrality                                                                                                                                                 | Observed power (alpha=0,05) |
| Error  |                                                                                                                                                                |                             |

|          |                                                                                                                              |              |      |
|----------|------------------------------------------------------------------------------------------------------------------------------|--------------|------|
| Cell No. | Tukey HSD test; variable DV_1 (Dataset_29.01)<br>Homogenous Groups, alpha = ,05000<br>Error: Within MS = ,20811, df = 22,000 |              |      |
|          | BMI                                                                                                                          | DV_1<br>Mean | 1    |
| 2        | V3 BMI [kg/m2]                                                                                                               | 22,70000     | **** |
| 1        | V0 BMI [kg/m2]                                                                                                               | 22,75833     | **** |
| 3        | StudyPeriod BMI [kg/m2]                                                                                                      | 22,91667     | **** |

|        |                                                                                                                    |          |    |          |
|--------|--------------------------------------------------------------------------------------------------------------------|----------|----|----------|
| Effect | Mauchly Sphericity Test (Dataset_29.01)<br>Sigma-restricted parameterization<br>Effective hypothesis decomposition |          |    |          |
|        | W                                                                                                                  | Chi-Sqr. | df | p        |
| BMI    | 0,579625                                                                                                           | 5,453738 | 2  | 0,065424 |

|           |                                                                                                                                                                |                     |          |          |          |                     |
|-----------|----------------------------------------------------------------------------------------------------------------------------------------------------------------|---------------------|----------|----------|----------|---------------------|
| Effect    | Repeated Measures Analysis of Variance with Effect Sizes and Powers (Dataset_29.01)<br>Sigma-restricted parameterization<br>Effective hypothesis decomposition |                     |          |          |          |                     |
|           | SS                                                                                                                                                             | Degr. of<br>Freedom | MS       | F        | p        | Partial eta-squared |
| Intercept | 1551,047                                                                                                                                                       | 1                   | 1551,047 | 2777,366 | 0,000000 | 0,996055            |
| Error     | 6,143                                                                                                                                                          | 11                  | 0,558    |          |          |                     |
| HBA1C%    | 1,816                                                                                                                                                          | 2                   | 0,908    | 23,650   | 0,000003 | 0,682540            |
| Error     | 0,844                                                                                                                                                          | 22                  | 0,038    |          |          |                     |

|           |                                                                                                                                                                |                             |
|-----------|----------------------------------------------------------------------------------------------------------------------------------------------------------------|-----------------------------|
| Effect    | Repeated Measures Analysis of Variance with Effect Sizes and Powers (Dataset_29.01)<br>Sigma-restricted parameterization<br>Effective hypothesis decomposition |                             |
|           | Non-centrality                                                                                                                                                 | Observed power (alpha=0,05) |
| Intercept | 2777,366                                                                                                                                                       | 1,000000                    |
| Error     |                                                                                                                                                                |                             |
| HBA1C%    | 47,300                                                                                                                                                         | 0,999976                    |
| Error     |                                                                                                                                                                |                             |

|          |                                                                                                                              |              |      |      |      |
|----------|------------------------------------------------------------------------------------------------------------------------------|--------------|------|------|------|
| Cell No. | Tukey HSD test; variable DV_1 (Dataset_29.01)<br>Homogenous Groups, alpha = ,05000<br>Error: Within MS = ,03838, df = 22,000 |              |      |      |      |
|          | HBA1C%                                                                                                                       | DV_1<br>Mean | 1    | 2    | 3    |
| 3        | StudyPeriod HbA1c [%]                                                                                                        | 6,291667     | **** |      |      |
| 2        | V3 HbA1c [%]                                                                                                                 | 6,558333     |      | **** |      |
| 1        | V0 HbA1c [%]                                                                                                                 | 6,841667     |      |      | **** |

|        |                                                                                                                    |          |    |          |
|--------|--------------------------------------------------------------------------------------------------------------------|----------|----|----------|
| Effect | Mauchly Sphericity Test (Dataset_29.01)<br>Sigma-restricted parameterization<br>Effective hypothesis decomposition |          |    |          |
|        | W                                                                                                                  | Chi-Sqr. | df | p        |
| HBA1C% | 0,797971                                                                                                           | 2,256831 | 2  | 0,323545 |

|           |                                                                                                                                                                |                     |          |          |          |                     |
|-----------|----------------------------------------------------------------------------------------------------------------------------------------------------------------|---------------------|----------|----------|----------|---------------------|
| Effect    | Repeated Measures Analysis of Variance with Effect Sizes and Powers (Dataset_29.01)<br>Sigma-restricted parameterization<br>Effective hypothesis decomposition |                     |          |          |          |                     |
|           | SS                                                                                                                                                             | Degr. of<br>Freedom | MS       | F        | p        | Partial eta-squared |
| Intercept | 83787,00                                                                                                                                                       | 1                   | 83787,00 | 1255,870 | 0,000000 | 0,991317            |
| Error     | 733,88                                                                                                                                                         | 11                  | 66,72    |          |          |                     |
| HBA1C     | 216,90                                                                                                                                                         | 2                   | 108,45   | 23,650   | 0,000003 | 0,682540            |
| Error     | 100,88                                                                                                                                                         | 22                  | 4,59     |          |          |                     |

|           |                                                                                                                                                   |                             |
|-----------|---------------------------------------------------------------------------------------------------------------------------------------------------|-----------------------------|
| Effect    | Repeated Measures Analysis of Variance with Effect<br>Sizes and Powers (Dataset_29.01)<br>Sigma-restriction<br>Effective hypothesis decomposition |                             |
|           | Non-centrality                                                                                                                                    | Observed power (alpha=0,05) |
| Intercept | 1255,870                                                                                                                                          | 1,000000                    |
| Error     |                                                                                                                                                   |                             |
| HBA1C     | 47,300                                                                                                                                            | 0,999976                    |
| Error     |                                                                                                                                                   |                             |

|          |                                                                                                                              |              |      |      |   |
|----------|------------------------------------------------------------------------------------------------------------------------------|--------------|------|------|---|
| Cell No. | Tukey HSD test; variable DV_1 (Dataset_29.01)<br>Homogenous Groups, alpha = ,05000<br>Error: Within MS = 4,5855, df = 22,000 |              |      |      |   |
|          | HBA1C                                                                                                                        | DV_1<br>Mean | 1    | 2    | 3 |
| 3        | StudyPeriod HbA1c [mmol/l]                                                                                                   | 45,26792     | **** |      |   |
| 2        | V3 HbA1c [mmol/l]                                                                                                            | 48,18258     |      | **** |   |

|          |                                                                                                                              |              |   |   |      |
|----------|------------------------------------------------------------------------------------------------------------------------------|--------------|---|---|------|
| Cell No. | Tukey HSD test; variable DV_1 (Dataset_29.01)<br>Homogenous Groups, alpha = ,05000<br>Error: Within MS = 4,5855, df = 22,000 |              |   |   |      |
|          | HBA1C                                                                                                                        | DV_1<br>Mean | 1 | 2 | 3    |
| 1        | V0 HbA1c [mmol/l]                                                                                                            | 51,27942     |   |   | **** |

|        |                                                                                                                    |          |    |          |
|--------|--------------------------------------------------------------------------------------------------------------------|----------|----|----------|
| Effect | Mauchly Sphericity Test (Dataset_29.01)<br>Sigma-restricted parameterization<br>Effective hypothesis decomposition |          |    |          |
|        | W                                                                                                                  | Chi-Sqr. | df | p        |
| HBA1C  | 0,797971                                                                                                           | 2,256831 | 2  | 0,323545 |

|           |                                                                                                                                                                |                     |         |          |          |                     |
|-----------|----------------------------------------------------------------------------------------------------------------------------------------------------------------|---------------------|---------|----------|----------|---------------------|
| Effect    | Repeated Measures Analysis of Variance with Effect Sizes and Powers (Dataset_29.01)<br>Sigma-restricted parameterization<br>Effective hypothesis decomposition |                     |         |          |          |                     |
|           | SS                                                                                                                                                             | Degr. of<br>Freedom | MS      | F        | p        | Partial eta-squared |
| Intercept | 3628102                                                                                                                                                        | 1                   | 3628102 | 3146,646 | 0,000000 | 0,996832            |
| Error     | 11530                                                                                                                                                          | 10                  | 1153    |          |          |                     |
| FRUCTO    | 6708                                                                                                                                                           | 2                   | 3354    | 7,198    | 0,004417 | 0,418551            |
| Error     | 9318                                                                                                                                                           | 20                  | 466     |          |          |                     |

|           |                                                                                                                                                                   |                             |
|-----------|-------------------------------------------------------------------------------------------------------------------------------------------------------------------|-----------------------------|
| Effect    | Repeated Measures Analysis of Variance with Effect<br>Sizes and Powers (Dataset_29.01)<br>Sigma-restricted parameterization<br>Effective hypothesis decomposition |                             |
|           | Non-centrality                                                                                                                                                    | Observed power (alpha=0,05) |
| Intercept | 3146,646                                                                                                                                                          | 1,000000                    |
| Error     |                                                                                                                                                                   |                             |
| FRUCTO    | 14,397                                                                                                                                                            | 0,891953                    |
| Error     |                                                                                                                                                                   |                             |

|          |                                                                                                                              |              |      |      |
|----------|------------------------------------------------------------------------------------------------------------------------------|--------------|------|------|
| Cell No. | Tukey HSD test; variable DV_1 (Dataset_29.01)<br>Homogenous Groups, alpha = ,05000<br>Error: Within MS = 465,92, df = 20,000 |              |      |      |
|          | FRUCTO                                                                                                                       | DV_1<br>Mean | 1    | 2    |
| 3        | StudyPeriod fructosamine [umol/l]                                                                                            | 317,1818     | **** |      |
| 2        | V3 fructosamine [umol/l]                                                                                                     | 326,5455     | **** |      |
| 1        | V0 fructosamine [umol/l]                                                                                                     | 351,0000     |      | **** |

|        |                                                                                                                    |          |    |          |
|--------|--------------------------------------------------------------------------------------------------------------------|----------|----|----------|
| Effect | Mauchly Sphericity Test (Dataset_29.01)<br>Sigma-restricted parameterization<br>Effective hypothesis decomposition |          |    |          |
|        | W                                                                                                                  | Chi-Sqr. | df | p        |
| FRUCTO | 0,668016                                                                                                           | 3,630990 | 2  | 0,162757 |

|           |                                                                                                                                                                |                  |          |          |          |                     |
|-----------|----------------------------------------------------------------------------------------------------------------------------------------------------------------|------------------|----------|----------|----------|---------------------|
| Effect    | Repeated Measures Analysis of Variance with Effect Sizes and Powers (Dataset_29.01)<br>Sigma-restricted parameterization<br>Effective hypothesis decomposition |                  |          |          |          |                     |
|           | SS                                                                                                                                                             | Degr. of Freedom | MS       | F        | p        | Partial eta-squared |
| Intercept | 777042,3                                                                                                                                                       | 1                | 777042,3 | 1791,915 | 0,000000 | 0,993899            |
| Error     | 4770,0                                                                                                                                                         | 11               | 433,6    |          |          |                     |
| MEANGLU   | 908,6                                                                                                                                                          | 2                | 454,3    | 8,042    | 0,002391 | 0,422326            |
| Error     | 1242,8                                                                                                                                                         | 22               | 56,5     |          |          |                     |

|           |                                                                                                                                                                |                             |
|-----------|----------------------------------------------------------------------------------------------------------------------------------------------------------------|-----------------------------|
| Effect    | Repeated Measures Analysis of Variance with Effect Sizes and Powers (Dataset_29.01)<br>Sigma-restricted parameterization<br>Effective hypothesis decomposition |                             |
|           | Non-centrality                                                                                                                                                 | Observed power (alpha=0,05) |
| Intercept | 1791,915                                                                                                                                                       | 1,000000                    |
| Error     |                                                                                                                                                                |                             |
| MEANGLU   | 16,084                                                                                                                                                         | 0,927458                    |
| Error     |                                                                                                                                                                |                             |

|          |                                                                                                                              |           |      |      |
|----------|------------------------------------------------------------------------------------------------------------------------------|-----------|------|------|
| Cell No. | Tukey HSD test; variable DV_1 (Dataset_29.01)<br>Homogenous Groups, alpha = ,05000<br>Error: Within MS = 56,492, df = 22,000 |           |      |      |
|          | MEANGLU                                                                                                                      | DV_1 Mean | 1    | 2    |
| 3        | StudyPeriod mean glucose [mg/dl]                                                                                             | 141,0667  | **** |      |
| 2        | V3 mean glucose [mg/dl]                                                                                                      | 146,3500  | **** | **** |
| 1        | V0 mean sensor glucose 4 weeks [mg/dl]                                                                                       | 153,3333  |      | **** |

|         |                                                                                                                    |          |    |          |
|---------|--------------------------------------------------------------------------------------------------------------------|----------|----|----------|
| Effect  | Mauchly Sphericity Test (Dataset_29.01)<br>Sigma-restricted parameterization<br>Effective hypothesis decomposition |          |    |          |
|         | W                                                                                                                  | Chi-Sqr. | df | p        |
| MEANGLU | 0,778692                                                                                                           | 2,501397 | 2  | 0,286305 |

| Effect    | Repeated Measures Analysis of Variance with Effect Sizes and Powers (Dataset_29.01)<br>Sigma-restricted parameterization<br>Effective hypothesis decomposition |                  |          |          |          |                     |
|-----------|----------------------------------------------------------------------------------------------------------------------------------------------------------------|------------------|----------|----------|----------|---------------------|
|           | SS                                                                                                                                                             | Degr. of Freedom | MS       | F        | p        | Partial eta-squared |
| Intercept | 91314,77                                                                                                                                                       | 1                | 91314,77 | 361,2113 | 0,000000 | 0,970447            |
| Error     | 2780,82                                                                                                                                                        | 11               | 252,80   |          |          |                     |
| SDGLU     | 394,85                                                                                                                                                         | 2                | 197,43   | 6,4951   | 0,006071 | 0,371251            |
| Error     | 668,72                                                                                                                                                         | 22               | 30,40    |          |          |                     |

| Effect    | Repeated Measures Analysis of Variance with Effect Sizes and Powers (Dataset_29.01)<br>Sigma-restricted parameterization<br>Effective hypothesis decomposition |                             |
|-----------|----------------------------------------------------------------------------------------------------------------------------------------------------------------|-----------------------------|
|           | Non-centrality                                                                                                                                                 | Observed power (alpha=0,05) |
| Intercept | 361,2113                                                                                                                                                       | 1,000000                    |
| Error     |                                                                                                                                                                |                             |
| SDGLU     | 12,9901                                                                                                                                                        | 0,862185                    |
| Error     |                                                                                                                                                                |                             |

| Cell No. | Tukey HSD test; variable DV_1 (Dataset_29.01)<br>Homogenous Groups, alpha = ,05000<br>Error: Within MS = 30,396, df = 22,000 |           |      |      |
|----------|------------------------------------------------------------------------------------------------------------------------------|-----------|------|------|
|          | SDGLU                                                                                                                        | DV_1 Mean | 1    | 2    |
| 3        | StudyPeriod SD glucose [mg/dl]                                                                                               | 46,91667  | **** |      |
| 2        | V3 SD glucose [mg/dl]                                                                                                        | 49,34167  | **** | **** |
| 1        | V0 SD sensor glucose 4 weeks[mg/dl]                                                                                          | 54,83333  |      | **** |

| Effect | Mauchly Sphericity Test (Dataset_29.01)<br>Sigma-restricted parameterization<br>Effective hypothesis decomposition |          |    |          |
|--------|--------------------------------------------------------------------------------------------------------------------|----------|----|----------|
|        | W                                                                                                                  | Chi-Sqr. | df | p        |
| SDGLU  | 0,847910                                                                                                           | 1,649807 | 2  | 0,438277 |

| Effect    | Repeated Measures Analysis of Variance with Effect Sizes and Powers (Dataset_29.01)<br>Sigma-restricted parameterization<br>Effective hypothesis decomposition |                  |          |          |          |                     |
|-----------|----------------------------------------------------------------------------------------------------------------------------------------------------------------|------------------|----------|----------|----------|---------------------|
|           | SS                                                                                                                                                             | Degr. of Freedom | MS       | F        | p        | Partial eta-squared |
| Intercept | 41840,26                                                                                                                                                       | 1                | 41840,26 | 645,1387 | 0,000000 | 0,983235            |
| Error     | 713,40                                                                                                                                                         | 11               | 64,85    |          |          |                     |
| CV        | 46,51                                                                                                                                                          | 2                | 23,25    | 2,6025   | 0,096722 | 0,191323            |
| Error     | 196,57                                                                                                                                                         | 22               | 8,94     |          |          |                     |

| Effect    | Repeated Measures Analysis of Variance with Effect Sizes and Powers (Dataset_29.01)<br>Sigma-restricted parameterization<br>Effective hypothesis decomposition |                             |
|-----------|----------------------------------------------------------------------------------------------------------------------------------------------------------------|-----------------------------|
|           | Non-centrality                                                                                                                                                 | Observed power (alpha=0,05) |
| Intercept | 645,1387                                                                                                                                                       | 1,000000                    |
| Error     |                                                                                                                                                                |                             |
| CV        | 5,2049                                                                                                                                                         | 0,463817                    |
| Error     |                                                                                                                                                                |                             |

| Effect | Mauchly Sphericity Test (Dataset_29.01)<br>Sigma-restricted parameterization<br>Effective hypothesis decomposition |          |    |          |
|--------|--------------------------------------------------------------------------------------------------------------------|----------|----|----------|
|        | W                                                                                                                  | Chi-Sqr. | df | p        |
| CV     | 0,876673                                                                                                           | 1,316211 | 2  | 0,517831 |

| Effect    | Repeated Measures Analysis of Variance with Effect Sizes and Powers (Dataset_29.01)<br>Sigma-restricted parameterization<br>Effective hypothesis decomposition |                  |          |          |          |                     |
|-----------|----------------------------------------------------------------------------------------------------------------------------------------------------------------|------------------|----------|----------|----------|---------------------|
|           | SS                                                                                                                                                             | Degr. of Freedom | MS       | F        | p        | Partial eta-squared |
| Intercept | 13,16830                                                                                                                                                       | 1                | 13,16830 | 592,7488 | 0,000000 | 0,981781            |
| Error     | 0,24437                                                                                                                                                        | 11               | 0,02222  |          |          |                     |
| DDI       | 0,00297                                                                                                                                                        | 2                | 0,00148  | 1,0529   | 0,365845 | 0,087359            |
| Error     | 0,03100                                                                                                                                                        | 22               | 0,00141  |          |          |                     |

| Effect    | Repeated Measures Analysis of Variance with Effect Sizes and Powers (Dataset_29.01)<br>Sigma-restricted parameterization<br>Effective hypothesis decomposition |                             |
|-----------|----------------------------------------------------------------------------------------------------------------------------------------------------------------|-----------------------------|
|           | Non-centrality                                                                                                                                                 | Observed power (alpha=0,05) |
| Intercept | 592,7488                                                                                                                                                       | 1,000000                    |
| Error     |                                                                                                                                                                |                             |
| DDI       | 2,1059                                                                                                                                                         | 0,210290                    |
| Error     |                                                                                                                                                                |                             |



|          |                                                                                                                              |           |      |
|----------|------------------------------------------------------------------------------------------------------------------------------|-----------|------|
| Cell No. | Tukey HSD test; variable DV_1 (Dataset_29.01)<br>Homogenous Groups, alpha = ,05000<br>Error: Within MS = ,00141, df = 22,000 |           |      |
|          | DDI                                                                                                                          | DV_1 Mean | 1    |
| 2        | V3 DDI [U/kg b.w.]                                                                                                           | 0,594520  | **** |
| 3        | StudyPeriod DDI [U/kg b.w.]                                                                                                  | 0,603284  | **** |
| 1        | V0 DDI 4 weeks [U/kg b.w.]                                                                                                   | 0,616604  | **** |

|        |                                                                                                                    |          |    |          |
|--------|--------------------------------------------------------------------------------------------------------------------|----------|----|----------|
| Effect | Mauchly Sphericity Test (Dataset_29.01)<br>Sigma-restricted parameterization<br>Effective hypothesis decomposition |          |    |          |
|        | W                                                                                                                  | Chi-Sqr. | df | p        |
| DDI    | 0,854988                                                                                                           | 1,566680 | 2  | 0,456877 |

|                                |                                                                                                                                                                                   |              |          |          |
|--------------------------------|-----------------------------------------------------------------------------------------------------------------------------------------------------------------------------------|--------------|----------|----------|
| Variable                       | Friedman ANOVA and Kendall Coeff. of Concordance (Dataset_29.01)<br>ANOVA Chi Sqr. (N = 12, df = 2) = 1,086957 p = ,58073<br>Coeff. of Concordance = ,04529 Aver. rank r = -,0415 |              |          |          |
|                                | Average Rank                                                                                                                                                                      | Sum of Ranks | Mean     | Std.Dev. |
| V0 time <54 mg/dl 4 weeks [%]  | 1,791667                                                                                                                                                                          | 21,50000     | 0,910833 | 1,565639 |
| V3 time <54 mg/dl [%]          | 2,000000                                                                                                                                                                          | 24,00000     | 0,700000 | 1,149704 |
| StudyPeriod time <54 mg/dl [%] | 2,208333                                                                                                                                                                          | 26,50000     | 0,525000 | 0,580165 |

|                                |                                                                                                                                                                                   |              |          |          |
|--------------------------------|-----------------------------------------------------------------------------------------------------------------------------------------------------------------------------------|--------------|----------|----------|
| Variable                       | Friedman ANOVA and Kendall Coeff. of Concordance (Dataset_29.01)<br>ANOVA Chi Sqr. (N = 12, df = 2) = ,2978723 p = ,86162<br>Coeff. of Concordance = ,01241 Aver. rank r = -,0774 |              |          |          |
|                                | Average Rank                                                                                                                                                                      | Sum of Ranks | Mean     | Std.Dev. |
| V0 time <70 mg/dl 4 weeks [%]  | 2,041667                                                                                                                                                                          | 24,50000     | 3,318333 | 2,950044 |
| V3 time <70 mg/dl [%]          | 1,875000                                                                                                                                                                          | 22,50000     | 2,608333 | 2,583324 |
| StudyPeriod time <70 mg/dl [%] | 2,083333                                                                                                                                                                          | 25,00000     | 2,216667 | 1,570080 |

| Effect    | Repeated Measures Analysis of Variance with Effect Sizes and Powers (Dataset_29.01)<br>Sigma-restricted parameterization<br>Effective hypothesis decomposition |                  |          |          |          |                     |
|-----------|----------------------------------------------------------------------------------------------------------------------------------------------------------------|------------------|----------|----------|----------|---------------------|
|           | SS                                                                                                                                                             | Degr. of Freedom | MS       | F        | p        | Partial eta-squared |
| Intercept | 196754,3                                                                                                                                                       | 1                | 196754,3 | 786,3221 | 0,000000 | 0,986204            |
| Error     | 2752,4                                                                                                                                                         | 11               | 250,2    |          |          |                     |
| 70-180    | 764,0                                                                                                                                                          | 2                | 382,0    | 12,3225  | 0,000257 | 0,528353            |
| Error     | 682,0                                                                                                                                                          | 22               | 31,0     |          |          |                     |

| Effect    | Repeated Measures Analysis of Variance with Effect Sizes and Powers (Dataset_29.01)<br>Sigma-restricted parameterization<br>Effective hypothesis decomposition |                             |
|-----------|----------------------------------------------------------------------------------------------------------------------------------------------------------------|-----------------------------|
|           | Non-centrality                                                                                                                                                 | Observed power (alpha=0,05) |
| Intercept | 786,3221                                                                                                                                                       | 1,000000                    |
| Error     |                                                                                                                                                                |                             |
| 70-180    | 24,6450                                                                                                                                                        | 0,989889                    |
| Error     |                                                                                                                                                                |                             |

| Cell No. | Tukey HSD test; variable DV_1 (Dataset_29.01)<br>Homogenous Groups, alpha = ,05000<br>Error: Within MS = 31,002, df = 22,000 |           |      |      |
|----------|------------------------------------------------------------------------------------------------------------------------------|-----------|------|------|
|          | 70-180                                                                                                                       | DV_1 Mean | 1    | 2    |
| 1        | V0 time 70-180 mg/dl 4 weeks [%]                                                                                             | 68,04333  |      | **** |
| 2        | V3 time 70-180 mg/dl [%]                                                                                                     | 74,45000  | **** |      |
| 3        | StudyPeriod time 70-180 mg/dl [%]                                                                                            | 79,29167  | **** |      |

| Effect | Mauchly Sphericity Test (Dataset_29.01)<br>Sigma-restricted parameterization<br>Effective hypothesis decomposition |          |    |          |
|--------|--------------------------------------------------------------------------------------------------------------------|----------|----|----------|
|        | W                                                                                                                  | Chi-Sqr. | df | p        |
| 70-180 | 0,842137                                                                                                           | 1,718128 | 2  | 0,423558 |

| Effect    | Repeated Measures Analysis of Variance with Effect Sizes and Powers (Dataset_29.01)<br>Sigma-restricted parameterization<br>Effective hypothesis decomposition |                  |          |          |          |                     |
|-----------|----------------------------------------------------------------------------------------------------------------------------------------------------------------|------------------|----------|----------|----------|---------------------|
|           | SS                                                                                                                                                             | Degr. of Freedom | MS       | F        | p        | Partial eta-squared |
| Intercept | 86378,19                                                                                                                                                       | 1                | 86378,19 | 283,6858 | 0,000000 | 0,962672            |
| Error     | 3349,34                                                                                                                                                        | 11               | 304,49   |          |          |                     |

| Effect | Repeated Measures Analysis of Variance with Effect Sizes and Powers (Dataset_29.01)<br>Sigma-restricted parameterization<br>Effective hypothesis decomposition |                  |        |         |          |                     |
|--------|----------------------------------------------------------------------------------------------------------------------------------------------------------------|------------------|--------|---------|----------|---------------------|
|        | SS                                                                                                                                                             | Degr. of Freedom | MS     | F       | p        | Partial eta-squared |
| 70-140 | 725,45                                                                                                                                                         | 2                | 362,72 | 12,9369 | 0,000193 | 0,540458            |
| Error  | 616,84                                                                                                                                                         | 22               | 28,04  |         |          |                     |

| Effect    | Repeated Measures Analysis of Variance with Effect Sizes and Powers (Dataset_29.01)<br>Sigma-restricted parameterization<br>Effective hypothesis decomposition |                             |
|-----------|----------------------------------------------------------------------------------------------------------------------------------------------------------------|-----------------------------|
|           | Non-centrality                                                                                                                                                 | Observed power (alpha=0,05) |
| Intercept | 283,6858                                                                                                                                                       | 1,000000                    |
| Error     |                                                                                                                                                                |                             |
| 70-140    | 25,8737                                                                                                                                                        | 0,992519                    |
| Error     |                                                                                                                                                                |                             |

| Cell No. | Tukey HSD test; variable DV_1 (Dataset_29.01)<br>Homogenous Groups, alpha = ,05000<br>Error: Within MS = 28,038, df = 22,000 |           |      |      |
|----------|------------------------------------------------------------------------------------------------------------------------------|-----------|------|------|
|          | 70-140                                                                                                                       | DV_1 Mean | 1    | 2    |
| 1        | V0 time 70-140 mg/dl 4 weeks [%]                                                                                             | 43,39250  |      | **** |
| 2        | V3 time 70-140 mg/dl [%]                                                                                                     | 49,17500  | **** |      |
| 3        | StudyPeriod time 70-140 mg/dl [%]                                                                                            | 54,38333  | **** |      |

| Effect | Mauchly Sphericity Test (Dataset_29.01)<br>Sigma-restricted parameterization<br>Effective hypothesis decomposition |          |    |          |
|--------|--------------------------------------------------------------------------------------------------------------------|----------|----|----------|
|        | W                                                                                                                  | Chi-Sqr. | df | p        |
| 70-140 | 0,776739                                                                                                           | 2,526515 | 2  | 0,282731 |

| Effect    | Repeated Measures Analysis of Variance with Effect Sizes and Powers (Dataset_29.01)<br>Sigma-restricted parameterization<br>Effective hypothesis decomposition |                  |          |          |          |                     |
|-----------|----------------------------------------------------------------------------------------------------------------------------------------------------------------|------------------|----------|----------|----------|---------------------|
|           | SS                                                                                                                                                             | Degr. of Freedom | MS       | F        | p        | Partial eta-squared |
| Intercept | 19626,14                                                                                                                                                       | 1                | 19626,14 | 87,15877 | 0,000001 | 0,887937            |
| Error     | 2476,95                                                                                                                                                        | 11               | 225,18   |          |          |                     |
| 180       | 621,09                                                                                                                                                         | 2                | 310,55   | 10,96831 | 0,000496 | 0,499279            |
| Error     | 622,89                                                                                                                                                         | 22               | 28,31    |          |          |                     |

| Effect    | Repeated Measures Analysis of Variance with Effect Sizes and Powers (Dataset_29.01)<br>Sigma-restricted parameterization<br>Effective hypothesis decomposition |                             |
|-----------|----------------------------------------------------------------------------------------------------------------------------------------------------------------|-----------------------------|
|           | Non-centrality                                                                                                                                                 | Observed power (alpha=0,05) |
| Intercept | 87,15877                                                                                                                                                       | 1,000000                    |
| Error     |                                                                                                                                                                |                             |
| 180       | 21,93663                                                                                                                                                       | 0,980644                    |
| Error     |                                                                                                                                                                |                             |

| Cell No. | Tukey HSD test; variable DV_1 (Dataset_29.01)<br>Homogenous Groups, alpha = ,05000<br>Error: Within MS = 28,313, df = 22,000 |              |      |      |
|----------|------------------------------------------------------------------------------------------------------------------------------|--------------|------|------|
|          | 180                                                                                                                          | DV_1<br>Mean | 1    | 2    |
| 3        | StudyPeriod time >180 mg/dl [%]                                                                                              | 18,49167     | **** |      |
| 2        | V3 time >180 mg/dl [%]                                                                                                       | 22,91667     | **** |      |
| 1        | V0 time >180 mg/dl 4 weeks [%]                                                                                               | 28,63833     |      | **** |

| Effect | Mauchley Sphericity Test (Dataset_29.01)<br>Sigma-restricted parameterization<br>Effective hypothesis decomposition |          |    |          |
|--------|---------------------------------------------------------------------------------------------------------------------|----------|----|----------|
|        | W                                                                                                                   | Chi-Sqr. | df | p        |
| 180    | 0,849571                                                                                                            | 1,630232 | 2  | 0,442588 |

| Effect    | Repeated Measures Analysis of Variance with Effect Sizes and Powers (Dataset_29.01)<br>Sigma-restricted parameterization<br>Effective hypothesis decomposition |                     |          |          |          |                     |
|-----------|----------------------------------------------------------------------------------------------------------------------------------------------------------------|---------------------|----------|----------|----------|---------------------|
|           | SS                                                                                                                                                             | Degr. of<br>Freedom | MS       | F        | p        | Partial eta-squared |
| Intercept | 943798,4                                                                                                                                                       | 1                   | 943798,4 | 3195,798 | 0,000000 | 0,996570            |
| Error     | 3248,6                                                                                                                                                         | 11                  | 295,3    |          |          |                     |
| MEANGLU   | 1868,7                                                                                                                                                         | 3                   | 622,9    | 17,798   | 0,000000 | 0,618035            |
| Error     | 1154,9                                                                                                                                                         | 33                  | 35,0     |          |          |                     |

| Effect    | Repeated Measures Analysis of Variance with Effect Sizes and Powers (Dataset_29.01)<br>Sigma-restricted parameterization<br>Effective hypothesis decomposition |                             |
|-----------|----------------------------------------------------------------------------------------------------------------------------------------------------------------|-----------------------------|
|           | Non-centrality                                                                                                                                                 | Observed power (alpha=0,05) |
| Intercept | 3195,798                                                                                                                                                       | 1,000000                    |
| Error     |                                                                                                                                                                |                             |
| MEANGLU   | 53,395                                                                                                                                                         | 0,999991                    |
| Error     |                                                                                                                                                                |                             |

|          |                                                                                                                              |              |      |      |
|----------|------------------------------------------------------------------------------------------------------------------------------|--------------|------|------|
| Cell No. | Tukey HSD test; variable DV_1 (Dataset_29.01)<br>Homogenous Groups, alpha = ,05000<br>Error: Within MS = 34,997, df = 33,000 |              |      |      |
|          | MEANGLU                                                                                                                      | DV_1<br>Mean | 1    | 2    |
| 4        | V6 median glucose [mg/dl]                                                                                                    | 129,9167     |      | **** |
| 3        | V5 mean glucose [mg/dl]                                                                                                      | 141,0417     | **** |      |
| 2        | V4 mean glucose [mg/dl]                                                                                                      | 143,5833     | **** |      |
| 1        | V3 mean glucose [mg/dl]                                                                                                      | 146,3500     | **** |      |

|         |                                                                                                                    |          |    |          |
|---------|--------------------------------------------------------------------------------------------------------------------|----------|----|----------|
| Effect  | Mauchly Sphericity Test (Dataset_29.01)<br>Sigma-restricted parameterization<br>Effective hypothesis decomposition |          |    |          |
|         | W                                                                                                                  | Chi-Sqr. | df | p        |
| MEANGLU | 0,306126                                                                                                           | 11,50878 | 5  | 0,042175 |

|           |                                                                                                                                                                |                     |          |          |          |                     |
|-----------|----------------------------------------------------------------------------------------------------------------------------------------------------------------|---------------------|----------|----------|----------|---------------------|
| Effect    | Repeated Measures Analysis of Variance with Effect Sizes and Powers (Dataset_29.01)<br>Sigma-restricted parameterization<br>Effective hypothesis decomposition |                     |          |          |          |                     |
|           | SS                                                                                                                                                             | Degr. of<br>Freedom | MS       | F        | p        | Partial eta-squared |
| Intercept | 106257,7                                                                                                                                                       | 1                   | 106257,7 | 369,7025 | 0,000000 | 0,971106            |
| Error     | 3161,6                                                                                                                                                         | 11                  | 287,4    |          |          |                     |
| SD        | 171,4                                                                                                                                                          | 3                   | 57,1     | 2,7595   | 0,057690 | 0,200551            |
| Error     | 683,1                                                                                                                                                          | 33                  | 20,7     |          |          |                     |

|           |                                                                                                                                                   |                             |
|-----------|---------------------------------------------------------------------------------------------------------------------------------------------------|-----------------------------|
| Effect    | Repeated Measures Analysis of Variance with Effect<br>Sizes and Powers (Dataset_29.01)<br>Sigma-restriction<br>Effective hypothesis decomposition |                             |
|           | Non-centrality                                                                                                                                    | Observed power (alpha=0,05) |
| Intercept | 369,7025                                                                                                                                          | 1,000000                    |
| Error     |                                                                                                                                                   |                             |
| SD        | 8,2784                                                                                                                                            | 0,613437                    |
| Error     |                                                                                                                                                   |                             |

|          |                                                                                                                              |              |      |      |
|----------|------------------------------------------------------------------------------------------------------------------------------|--------------|------|------|
| Cell No. | Tukey HSD test; variable DV_1 (Dataset_29.01)<br>Homogenous Groups, alpha = ,05000<br>Error: Within MS = 20,701, df = 33,000 |              |      |      |
|          | SD                                                                                                                           | DV_1<br>Mean | 1    | 2    |
| 4        | V6 SD glucose [mg/dl]                                                                                                        | 44,08333     | **** |      |
| 2        | V4 SD glucose [mg/dl]                                                                                                        | 47,37500     | **** | **** |
| 3        | V5 SD glucose [mg/dl]                                                                                                        | 47,40000     | **** | **** |
| 1        | V3 SD glucose [mg/dl]                                                                                                        | 49,34167     |      | **** |

|        |                                                                                                                    |          |    |          |
|--------|--------------------------------------------------------------------------------------------------------------------|----------|----|----------|
| Effect | Mauchly Sphericity Test (Dataset_29.01)<br>Sigma-restricted parameterization<br>Effective hypothesis decomposition |          |    |          |
|        | W                                                                                                                  | Chi-Sqr. | df | p        |
| SD     | 0,214567                                                                                                           | 14,96380 | 5  | 0,010518 |

|        |                                                                                                                                                 |          |          |                |                 |                 |               |
|--------|-------------------------------------------------------------------------------------------------------------------------------------------------|----------|----------|----------------|-----------------|-----------------|---------------|
| Effect | Adjusted Univariate Tests for Repeated Measure: DV_1 (Dataset_29.01)<br>Sigma-restricted parameterization<br>Effective hypothesis decomposition |          |          |                |                 |                 |               |
|        | Degr. of<br>Freedom                                                                                                                             | F        | p        | G-G<br>Epsilon | G-G<br>Adj. df1 | G-G<br>Adj. df2 | G-G<br>Adj. p |
| SD     | 3                                                                                                                                               | 2,759474 | 0,057690 | 0,556846       | 1,670538        | 18,37592        | 0,096990      |
| Error  | 33                                                                                                                                              |          |          |                |                 |                 |               |

|        |                                                                                                                                                 |                 |                 |               |                     |                      |                      |
|--------|-------------------------------------------------------------------------------------------------------------------------------------------------|-----------------|-----------------|---------------|---------------------|----------------------|----------------------|
| Effect | Adjusted Univariate Tests for Repeated Measure: DV_1 (Dataset_29.01)<br>Sigma-restricted parameterization<br>Effective hypothesis decomposition |                 |                 |               |                     |                      |                      |
|        | H-F<br>Epsilon                                                                                                                                  | H-F<br>Adj. df1 | H-F<br>Adj. df2 | H-F<br>Adj. p | Lowr.Bnd<br>Epsilon | Lowr.Bnd<br>Adj. df1 | Lowr.Bnd<br>Adj. df2 |
| SD     | 0,644784                                                                                                                                        | 1,934351        | 21,27786        | 0,087475      | 0,333333            | 1,000000             | 11,00000             |
| Error  |                                                                                                                                                 |                 |                 |               |                     |                      |                      |

|        |                                                                                                                                           |
|--------|-------------------------------------------------------------------------------------------------------------------------------------------|
| Effect | Adjusted Univariate Tests for Repeated Measure: DV_1 (Dataset_29.01) Sigma-restricted parameterization Effective hypothesis decomposition |
|        | Lowr.Bnd Adj. p                                                                                                                           |
| SD     | 0,124885                                                                                                                                  |
| Error  |                                                                                                                                           |

|           |                                                                                                                                                          |                  |          |          |          |                     |
|-----------|----------------------------------------------------------------------------------------------------------------------------------------------------------|------------------|----------|----------|----------|---------------------|
| Effect    | Repeated Measures Analysis of Variance with Effect Sizes and Powers (Dataset_29.01) Sigma-restricted parameterization Effective hypothesis decomposition |                  |          |          |          |                     |
|           | SS                                                                                                                                                       | Degr. of Freedom | MS       | F        | p        | Partial eta-squared |
| Intercept | 52007,62                                                                                                                                                 | 1                | 52007,62 | 635,2750 | 0,000000 | 0,982979            |
| Error     | 900,53                                                                                                                                                   | 11               | 81,87    |          |          |                     |
| CV        | 20,47                                                                                                                                                    | 3                | 6,82     | 1,0727   | 0,374047 | 0,088852            |
| Error     | 209,88                                                                                                                                                   | 33               | 6,36     |          |          |                     |

|           |                                                                                                                                                          |                             |
|-----------|----------------------------------------------------------------------------------------------------------------------------------------------------------|-----------------------------|
| Effect    | Repeated Measures Analysis of Variance with Effect Sizes and Powers (Dataset_29.01) Sigma-restricted parameterization Effective hypothesis decomposition |                             |
|           | Non-centrality                                                                                                                                           | Observed power (alpha=0,05) |
| Intercept | 635,2750                                                                                                                                                 | 1,000000                    |
| Error     |                                                                                                                                                          |                             |
| CV        | 3,2181                                                                                                                                                   | 0,263283                    |
| Error     |                                                                                                                                                          |                             |

|          |                                                                                                                        |           |      |
|----------|------------------------------------------------------------------------------------------------------------------------|-----------|------|
| Cell No. | Tukey HSD test; variable DV_1 (Dataset_29.01) Homogenous Groups, alpha = ,05000 Error: Within MS = 6,3601, df = 33,000 |           |      |
|          | CV                                                                                                                     | DV_1 Mean | 1    |
| 4        | V6 CV glucose [%]                                                                                                      | 31,92665  | **** |
| 2        | V4 CV glucose [%]                                                                                                      | 32,73109  | **** |

|          |                                                                                                                                 |              |      |
|----------|---------------------------------------------------------------------------------------------------------------------------------|--------------|------|
| Cell No. | Tukey HSD test; variable DV_1<br>(Dataset_29.01)<br>Homogenous Groups, alpha = ,05000<br>Error: Within MS = 6,3601, df = 33,000 |              |      |
|          | CV                                                                                                                              | DV_1<br>Mean | 1    |
| 1        | V3 CV glucose [%]                                                                                                               | 33,48048     | **** |
| 3        | V5 CV glucose [%]                                                                                                               | 33,52753     | **** |

|        |                                                                                                                    |          |    |          |
|--------|--------------------------------------------------------------------------------------------------------------------|----------|----|----------|
| Effect | Mauchly Sphericity Test (Dataset_29.01)<br>Sigma-restricted parameterization<br>Effective hypothesis decomposition |          |    |          |
|        | W                                                                                                                  | Chi-Sqr. | df | p        |
| CV     | 0,475252                                                                                                           | 7,232468 | 5  | 0,203917 |

|                       |                                                                                                                                                                                             |                 |          |          |
|-----------------------|---------------------------------------------------------------------------------------------------------------------------------------------------------------------------------------------|-----------------|----------|----------|
| Variable              | Friedman ANOVA and Kendall Coeff. of<br>Concordance (Dataset_29.01)<br>ANOVA Chi Sqr. (N = 12, df = 3) = ,1926606 p =<br>,97877<br>Coeff. of Concordance = ,00535 Aver. rank r = -<br>,0851 |                 |          |          |
|                       | Average<br>Rank                                                                                                                                                                             | Sum of<br>Ranks | Mean     | Std.Dev. |
| V3 time <54 mg/dl [%] | 2,500000                                                                                                                                                                                    | 30,00000        | 0,700000 | 1,149704 |
| V4 time <54 mg/dl [%] | 2,416667                                                                                                                                                                                    | 29,00000        | 0,508333 | 0,548483 |
| V5 time <54 mg/dl [%] | 2,458333                                                                                                                                                                                    | 29,50000        | 0,500000 | 0,698049 |
| V6 time <54 mg/dl [%] | 2,625000                                                                                                                                                                                    | 31,50000        | 0,483333 | 0,539079 |

|                       |                                                                                                                                                                                             |                 |          |          |
|-----------------------|---------------------------------------------------------------------------------------------------------------------------------------------------------------------------------------------|-----------------|----------|----------|
| Variable              | Friedman ANOVA and Kendall Coeff. of<br>Concordance (Dataset_29.01)<br>ANOVA Chi Sqr. (N = 12, df = 3) = ,7118644 p =<br>,87041<br>Coeff. of Concordance = ,01977 Aver. rank r = -<br>,0693 |                 |          |          |
|                       | Average<br>Rank                                                                                                                                                                             | Sum of<br>Ranks | Mean     | Std.Dev. |
| V3 time <70 mg/dl [%] | 2,500000                                                                                                                                                                                    | 30,00000        | 2,608333 | 2,583324 |
| V4 time <70 mg/dl [%] | 2,250000                                                                                                                                                                                    | 27,00000        | 1,916667 | 1,339493 |
| V5 time <70 mg/dl [%] | 2,666667                                                                                                                                                                                    | 32,00000        | 2,308333 | 2,103442 |
| V6 time <70 mg/dl [%] | 2,583333                                                                                                                                                                                    | 31,00000        | 2,191667 | 1,509641 |



| Effect    | Repeated Measures Analysis of Variance with Effect Sizes and Powers (Dataset_29.01)<br>Sigma-restricted parameterization<br>Effective hypothesis decomposition |                  |          |          |          |                     |
|-----------|----------------------------------------------------------------------------------------------------------------------------------------------------------------|------------------|----------|----------|----------|---------------------|
|           | SS                                                                                                                                                             | Degr. of Freedom | MS       | F        | p        | Partial eta-squared |
| Intercept | 297265,6                                                                                                                                                       | 1                | 297265,6 | 1517,979 | 0,000000 | 0,992806            |
| Error     | 2154,1                                                                                                                                                         | 11               | 195,8    |          |          |                     |
| 70-180    | 363,8                                                                                                                                                          | 3                | 121,3    | 6,755    | 0,001120 | 0,380471            |
| Error     | 592,4                                                                                                                                                          | 33               | 18,0     |          |          |                     |

| Effect    | Repeated Measures Analysis of Variance with Effect Sizes and Powers (Dataset_29.01)<br>Sigma-restricted parameterization<br>Effective hypothesis decomposition |                             |
|-----------|----------------------------------------------------------------------------------------------------------------------------------------------------------------|-----------------------------|
|           | Non-centrality                                                                                                                                                 | Observed power (alpha=0,05) |
| Intercept | 1517,979                                                                                                                                                       | 1,000000                    |
| Error     |                                                                                                                                                                |                             |
| 70-180    | 20,266                                                                                                                                                         | 0,958732                    |
| Error     |                                                                                                                                                                |                             |

| Cell No. | Tukey HSD test; variable DV_1 (Dataset_29.01)<br>Homogenous Groups, alpha = ,05000<br>Error: Within MS = 17,951, df = 33,000 |           |      |      |
|----------|------------------------------------------------------------------------------------------------------------------------------|-----------|------|------|
|          | 70-180                                                                                                                       | DV_1 Mean | 1    | 2    |
| 1        | V3 time 70-180 mg/dl [%]                                                                                                     | 74,45000  |      | **** |
| 2        | V4 time 70-180 mg/dl [%]                                                                                                     | 78,70000  | **** | **** |
| 3        | V5 time 70-180 mg/dl [%]                                                                                                     | 79,53333  | **** |      |
| 4        | V6 time 70-180 mg/dl [%]                                                                                                     | 82,10000  | **** |      |

| Effect | Mauchly Sphericity Test (Dataset_29.01)<br>Sigma-restricted parameterization<br>Effective hypothesis decomposition |          |    |          |
|--------|--------------------------------------------------------------------------------------------------------------------|----------|----|----------|
|        | W                                                                                                                  | Chi-Sqr. | df | p        |
| 70-180 | 0,235695                                                                                                           | 14,05072 | 5  | 0,015290 |

| Effect | Adjusted Univariate Tests for Repeated Measure: DV_1 (Dataset_29.01)<br>Sigma-restricted parameterization<br>Effective hypothesis decomposition |          |          |             |              |              |            |
|--------|-------------------------------------------------------------------------------------------------------------------------------------------------|----------|----------|-------------|--------------|--------------|------------|
|        | Degr. of Freedom                                                                                                                                | F        | p        | G-G Epsilon | G-G Adj. df1 | G-G Adj. df2 | G-G Adj. p |
| 70-180 | 3                                                                                                                                               | 6,755422 | 0,001120 | 0,537010    | 1,611031     | 17,72134     | 0,009445   |

| Effect | Adjusted Univariate Tests for Repeated Measure: DV_1 (Dataset_29.01)<br>Sigma-restricted parameterization<br>Effective hypothesis decomposition |   |   |             |              |              |            |
|--------|-------------------------------------------------------------------------------------------------------------------------------------------------|---|---|-------------|--------------|--------------|------------|
|        | Degr. of Freedom                                                                                                                                | F | p | G-G Epsilon | G-G Adj. df1 | G-G Adj. df2 | G-G Adj. p |
| Error  | 33                                                                                                                                              |   |   |             |              |              |            |

| Effect | Adjusted Univariate Tests for Repeated Measure: DV_1 (Dataset_29.01)<br>Sigma-restricted parameterization<br>Effective hypothesis decomposition |              |              |            |                  |                   |                   |
|--------|-------------------------------------------------------------------------------------------------------------------------------------------------|--------------|--------------|------------|------------------|-------------------|-------------------|
|        | H-F Epsilon                                                                                                                                     | H-F Adj. df1 | H-F Adj. df2 | H-F Adj. p | Lowr.Bnd Epsilon | Lowr.Bnd Adj. df1 | Lowr.Bnd Adj. df2 |
| 70-180 | 0,615345                                                                                                                                        | 1,846036     | 20,30639     | 0,006550   | 0,333333         | 1,000000          | 11,00000          |
| Error  |                                                                                                                                                 |              |              |            |                  |                   |                   |

| Effect | Adjusted Univariate Tests for Repeated Measure: DV_1 (Dataset_29.01)<br>Sigma-restricted parameterization<br>Effective hypothesis decomposition |
|--------|-------------------------------------------------------------------------------------------------------------------------------------------------|
|        | Lowr.Bnd Adj. p                                                                                                                                 |
| 70-180 | 0,024733                                                                                                                                        |
| Error  |                                                                                                                                                 |

| Effect    | Repeated Measures Analysis of Variance with Effect Sizes and Powers (Dataset_29.01)<br>Sigma-restricted parameterization<br>Effective hypothesis decomposition |                  |          |          |          |                     |
|-----------|----------------------------------------------------------------------------------------------------------------------------------------------------------------|------------------|----------|----------|----------|---------------------|
|           | SS                                                                                                                                                             | Degr. of Freedom | MS       | F        | p        | Partial eta-squared |
| Intercept | 141050,1                                                                                                                                                       | 1                | 141050,1 | 542,1351 | 0,000000 | 0,980113            |
| Error     | 2861,9                                                                                                                                                         | 11               | 260,2    |          |          |                     |
| 70-140    | 499,5                                                                                                                                                          | 3                | 166,5    | 6,2847   | 0,001710 | 0,363599            |
| Error     | 874,2                                                                                                                                                          | 33               | 26,5     |          |          |                     |

| Effect    | Repeated Measures Analysis of Variance with Effect Sizes and Powers (Dataset_29.01)<br>Sigma-restricted parameterization<br>Effective hypothesis decomposition |                             |
|-----------|----------------------------------------------------------------------------------------------------------------------------------------------------------------|-----------------------------|
|           | Non-centrality                                                                                                                                                 | Observed power (alpha=0,05) |
| Intercept | 542,1351                                                                                                                                                       | 1,000000                    |
| Error     |                                                                                                                                                                |                             |
| 70-140    | 18,8541                                                                                                                                                        | 0,944323                    |

|        |                                                                                                                                                                |                             |
|--------|----------------------------------------------------------------------------------------------------------------------------------------------------------------|-----------------------------|
| Effect | Repeated Measures Analysis of Variance with Effect Sizes and Powers (Dataset_29.01)<br>Sigma-restricted parameterization<br>Effective hypothesis decomposition |                             |
|        | Non-centrality                                                                                                                                                 | Observed power (alpha=0,05) |
| Error  |                                                                                                                                                                |                             |

|          |                                                                                                                              |              |      |      |
|----------|------------------------------------------------------------------------------------------------------------------------------|--------------|------|------|
| Cell No. | Tukey HSD test; variable DV_1 (Dataset_29.01)<br>Homogenous Groups, alpha = ,05000<br>Error: Within MS = 26,491, df = 33,000 |              |      |      |
|          | 70-140                                                                                                                       | DV_1<br>Mean | 1    | 2    |
| 1        | V3 time 70-140 mg/dl [%]                                                                                                     | 49,17500     |      | **** |
| 2        | V4 time 70-140 mg/dl [%]                                                                                                     | 54,20000     | **** | **** |
| 3        | V5 time 70-140 mg/dl [%]                                                                                                     | 55,39167     | **** |      |
| 4        | V6 time 70-140 mg/dl [%]                                                                                                     | 58,06667     | **** |      |

|        |                                                                                                                    |          |    |          |
|--------|--------------------------------------------------------------------------------------------------------------------|----------|----|----------|
| Effect | Mauchly Sphericity Test (Dataset_29.01)<br>Sigma-restricted parameterization<br>Effective hypothesis decomposition |          |    |          |
|        | W                                                                                                                  | Chi-Sqr. | df | p        |
| 70-140 | 0,500698                                                                                                           | 6,725375 | 5  | 0,241879 |

|           |                                                                                                                                                                |                     |          |          |          |                     |
|-----------|----------------------------------------------------------------------------------------------------------------------------------------------------------------|---------------------|----------|----------|----------|---------------------|
| Effect    | Repeated Measures Analysis of Variance with Effect Sizes and Powers (Dataset_29.01)<br>Sigma-restricted parameterization<br>Effective hypothesis decomposition |                     |          |          |          |                     |
|           | SS                                                                                                                                                             | Degr. of<br>Freedom | MS       | F        | p        | Partial eta-squared |
| Intercept | 17404,08                                                                                                                                                       | 1                   | 17404,08 | 105,6363 | 0,000001 | 0,905690            |
| Error     | 1812,30                                                                                                                                                        | 11                  | 164,75   |          |          |                     |
| 180       | 324,29                                                                                                                                                         | 3                   | 108,10   | 6,5012   | 0,001406 | 0,371471            |
| Error     | 548,69                                                                                                                                                         | 33                  | 16,63    |          |          |                     |

|           |                                                                                                                                                                |                             |
|-----------|----------------------------------------------------------------------------------------------------------------------------------------------------------------|-----------------------------|
| Effect    | Repeated Measures Analysis of Variance with Effect Sizes and Powers (Dataset_29.01)<br>Sigma-restricted parameterization<br>Effective hypothesis decomposition |                             |
|           | Non-centrality                                                                                                                                                 | Observed power (alpha=0,05) |
| Intercept | 105,6363                                                                                                                                                       | 1,000000                    |
| Error     |                                                                                                                                                                |                             |
| 180       | 19,5036                                                                                                                                                        | 0,951441                    |
| Error     |                                                                                                                                                                |                             |

| Cell No. | Tukey HSD test; variable DV_1 (Dataset_29.01)<br>Homogenous Groups, alpha = ,05000<br>Error: Within MS = 16,627, df = 33,000 |              |      |      |
|----------|------------------------------------------------------------------------------------------------------------------------------|--------------|------|------|
|          | 180                                                                                                                          | DV_1<br>Mean | 1    | 2    |
| 4        | V6 time >180 mg/dl [%]                                                                                                       | 15,70833     | **** |      |
| 3        | V5 time >180 mg/dl [%]                                                                                                       | 18,15833     | **** |      |
| 2        | V4 time >180 mg/dl [%]                                                                                                       | 19,38333     | **** | **** |
| 1        | V3 time >180 mg/dl [%]                                                                                                       | 22,91667     |      | **** |

| Effect | Mauchley Sphericity Test (Dataset_29.01)<br>Sigma-restricted parameterization<br>Effective hypothesis decomposition |          |    |          |
|--------|---------------------------------------------------------------------------------------------------------------------|----------|----|----------|
|        | W                                                                                                                   | Chi-Sqr. | df | p        |
| 180    | 0,259504                                                                                                            | 13,11511 | 5  | 0,022324 |

| Effect | Adjusted Univariate Tests for Repeated Measure: DV_1 (Dataset_29.01)<br>Sigma-restricted parameterization<br>Effective hypothesis decomposition |          |          |                |                 |                 |               |
|--------|-------------------------------------------------------------------------------------------------------------------------------------------------|----------|----------|----------------|-----------------|-----------------|---------------|
|        | Degr. of<br>Freedom                                                                                                                             | F        | p        | G-G<br>Epsilon | G-G<br>Adj. df1 | G-G<br>Adj. df2 | G-G<br>Adj. p |
| 180    | 3                                                                                                                                               | 6,501185 | 0,001406 | 0,542679       | 1,628036        | 17,90840        | 0,010502      |
| Error  | 33                                                                                                                                              |          |          |                |                 |                 |               |

| Effect | Adjusted Univariate Tests for Repeated Measure: DV_1 (Dataset_29.01)<br>Sigma-restricted parameterization<br>Effective hypothesis decomposition |                 |                 |               |                     |                      |                      |
|--------|-------------------------------------------------------------------------------------------------------------------------------------------------|-----------------|-----------------|---------------|---------------------|----------------------|----------------------|
|        | H-F<br>Epsilon                                                                                                                                  | H-F<br>Adj. df1 | H-F<br>Adj. df2 | H-F<br>Adj. p | Lowr.Bnd<br>Epsilon | Lowr.Bnd<br>Adj. df1 | Lowr.Bnd<br>Adj. df2 |
| 180    | 0,623720                                                                                                                                        | 1,871159        | 20,58275        | 0,007317      | 0,333333            | 1,000000             | 11,00000             |
| Error  |                                                                                                                                                 |                 |                 |               |                     |                      |                      |

|        |                                                                                                                                           |
|--------|-------------------------------------------------------------------------------------------------------------------------------------------|
| Effect | Adjusted Univariate Tests for Repeated Measure: DV_1 (Dataset_29.01) Sigma-restricted parameterization Effective hypothesis decomposition |
|        | Lowr.Bnd Adj. p                                                                                                                           |
| 180    | 0,027007                                                                                                                                  |
| Error  |                                                                                                                                           |

|           |                                                                                                                                                          |                  |          |          |          |                     |
|-----------|----------------------------------------------------------------------------------------------------------------------------------------------------------|------------------|----------|----------|----------|---------------------|
| Effect    | Repeated Measures Analysis of Variance with Effect Sizes and Powers (Dataset_29.01) Sigma-restricted parameterization Effective hypothesis decomposition |                  |          |          |          |                     |
|           | SS                                                                                                                                                       | Degr. of Freedom | MS       | F        | p        | Partial eta-squared |
| Intercept | 17,29323                                                                                                                                                 | 1                | 17,29323 | 471,3842 | 0,000000 | 0,977197            |
| Error     | 0,40355                                                                                                                                                  | 11               | 0,03669  |          |          |                     |
| DDI       | 0,00098                                                                                                                                                  | 3                | 0,00033  | 0,3031   | 0,822892 | 0,026819            |
| Error     | 0,03563                                                                                                                                                  | 33               | 0,00108  |          |          |                     |

|           |                                                                                                                                                          |                             |
|-----------|----------------------------------------------------------------------------------------------------------------------------------------------------------|-----------------------------|
| Effect    | Repeated Measures Analysis of Variance with Effect Sizes and Powers (Dataset_29.01) Sigma-restricted parameterization Effective hypothesis decomposition |                             |
|           | Non-centrality                                                                                                                                           | Observed power (alpha=0,05) |
| Intercept | 471,3842                                                                                                                                                 | 1,000000                    |
| Error     |                                                                                                                                                          |                             |
| DDI       | 0,9094                                                                                                                                                   | 0,102202                    |
| Error     |                                                                                                                                                          |                             |

|          |                                                                                                                        |           |      |
|----------|------------------------------------------------------------------------------------------------------------------------|-----------|------|
| Cell No. | Tukey HSD test; variable DV_1 (Dataset_29.01) Homogenous Groups, alpha = ,05000 Error: Within MS = ,00108, df = 33,000 |           |      |
|          | DDI                                                                                                                    | DV_1 Mean | 1    |
| 1        | V3 DDI [U/kg b.w.]                                                                                                     | 0,594520  | **** |
| 4        | V6 DDI [U/kg b.w.]                                                                                                     | 0,598526  | **** |

|          |                                                                                                                                 |              |      |
|----------|---------------------------------------------------------------------------------------------------------------------------------|--------------|------|
| Cell No. | Tukey HSD test; variable DV_1<br>(Dataset_29.01)<br>Homogenous Groups, alpha = ,05000<br>Error: Within MS = ,00108, df = 33,000 |              |      |
|          | DDI                                                                                                                             | DV_1<br>Mean | 1    |
| 3        | V5 DDI [U/kg b.w.]                                                                                                              | 0,600867     | **** |
| 2        | V4 DDI [U/kg b.w.]                                                                                                              | 0,607005     | **** |

|        |                                                                                                                    |          |    |          |
|--------|--------------------------------------------------------------------------------------------------------------------|----------|----|----------|
| Effect | Mauchly Sphericity Test (Dataset_29.01)<br>Sigma-restricted parameterization<br>Effective hypothesis decomposition |          |    |          |
|        | W                                                                                                                  | Chi-Sqr. | df | p        |
| DDI    | 0,426892                                                                                                           | 8,275786 | 5  | 0,141677 |

|           |                                                                                                                                                                |                     |          |          |          |                     |
|-----------|----------------------------------------------------------------------------------------------------------------------------------------------------------------|---------------------|----------|----------|----------|---------------------|
| Effect    | Repeated Measures Analysis of Variance with Effect Sizes and Powers (Dataset_29.01)<br>Sigma-restricted parameterization<br>Effective hypothesis decomposition |                     |          |          |          |                     |
|           | SS                                                                                                                                                             | Degr. of<br>Freedom | MS       | F        | p        | Partial eta-squared |
| Intercept | 25007,07                                                                                                                                                       | 1                   | 25007,07 | 908,4621 | 0,000000 | 0,988036            |
| Error     | 302,80                                                                                                                                                         | 11                  | 27,53    |          |          |                     |
| BMI       | 0,30                                                                                                                                                           | 3                   | 0,10     | 1,1662   | 0,337402 | 0,095854            |
| Error     | 2,80                                                                                                                                                           | 33                  | 0,08     |          |          |                     |

|           |                                                                                                                                                   |                             |
|-----------|---------------------------------------------------------------------------------------------------------------------------------------------------|-----------------------------|
| Effect    | Repeated Measures Analysis of Variance with Effect<br>Sizes and Powers (Dataset_29.01)<br>Sigma-restriction<br>Effective hypothesis decomposition |                             |
|           | Non-centrality                                                                                                                                    | Observed power (alpha=0,05) |
| Intercept | 908,4621                                                                                                                                          | 1,000000                    |
| Error     |                                                                                                                                                   |                             |
| BMI       | 3,4985                                                                                                                                            | 0,284165                    |
| Error     |                                                                                                                                                   |                             |

|        |                                                                                                                    |          |    |          |
|--------|--------------------------------------------------------------------------------------------------------------------|----------|----|----------|
| Effect | Mauchly Sphericity Test (Dataset_29.01)<br>Sigma-restricted parameterization<br>Effective hypothesis decomposition |          |    |          |
|        | W                                                                                                                  | Chi-Sqr. | df | p        |
| BMI    | 0,117939                                                                                                           | 20,78207 | 5  | 0,000891 |

| Effect | Adjusted Univariate Tests for Repeated Measure: DV_1 (Dataset_29.01)<br>Sigma-restricted parameterization<br>Effective hypothesis decomposition |          |          |             |              |              |            |
|--------|-------------------------------------------------------------------------------------------------------------------------------------------------|----------|----------|-------------|--------------|--------------|------------|
|        | Degr. of Freedom                                                                                                                                | F        | p        | G-G Epsilon | G-G Adj. df1 | G-G Adj. df2 | G-G Adj. p |
| BMI    | 3                                                                                                                                               | 1,166170 | 0,337402 | 0,543038    | 1,629115     | 17,92026     | 0,323981   |
| Error  | 33                                                                                                                                              |          |          |             |              |              |            |

| Effect | Adjusted Univariate Tests for Repeated Measure: DV_1 (Dataset_29.01)<br>Sigma-restricted parameterization<br>Effective hypothesis decomposition |              |              |            |                  |                   |                   |
|--------|-------------------------------------------------------------------------------------------------------------------------------------------------|--------------|--------------|------------|------------------|-------------------|-------------------|
|        | H-F Epsilon                                                                                                                                     | H-F Adj. df1 | H-F Adj. df2 | H-F Adj. p | Lowr.Bnd Epsilon | Lowr.Bnd Adj. df1 | Lowr.Bnd Adj. df2 |
| BMI    | 0,624252                                                                                                                                        | 1,872755     | 20,60031     | 0,328303   | 0,333333         | 1,000000          | 11,00000          |
| Error  |                                                                                                                                                 |              |              |            |                  |                   |                   |

| Effect | Adjusted Univariate Tests for Repeated Measure: DV_1 (Dataset_29.01)<br>Sigma-restricted parameterization<br>Effective hypothesis decomposition |
|--------|-------------------------------------------------------------------------------------------------------------------------------------------------|
|        | Lowr.Bnd Adj. p                                                                                                                                 |
| BMI    | 0,303298                                                                                                                                        |
| Error  |                                                                                                                                                 |

| Effect    | Repeated Measures Analysis of Variance with Effect Sizes and Powers (Dataset_29.01)<br>Sigma-restricted parameterization<br>Effective hypothesis decomposition |                  |          |          |          |                     |
|-----------|----------------------------------------------------------------------------------------------------------------------------------------------------------------|------------------|----------|----------|----------|---------------------|
|           | SS                                                                                                                                                             | Degr. of Freedom | MS       | F        | p        | Partial eta-squared |
| Intercept | 242237,9                                                                                                                                                       | 1                | 242237,9 | 389,1546 | 0,000000 | 0,972511            |
| Error     | 6847,2                                                                                                                                                         | 11               | 622,5    |          |          |                     |
| WEIGHT    | 3,2                                                                                                                                                            | 3                | 1,1      | 1,2063   | 0,322732 | 0,098827            |
| Error     | 28,9                                                                                                                                                           | 33               | 0,9      |          |          |                     |

| Effect    | Repeated Measures Analysis of Variance with Effect Sizes and Powers (Dataset_29.01)<br>Sigma-restricted parameterization<br>Effective hypothesis decomposition |                             |
|-----------|----------------------------------------------------------------------------------------------------------------------------------------------------------------|-----------------------------|
|           | Non-centrality                                                                                                                                                 | Observed power (alpha=0,05) |
| Intercept | 389,1546                                                                                                                                                       | 1,000000                    |
| Error     |                                                                                                                                                                |                             |
| WEIGHT    | 3,6189                                                                                                                                                         | 0,293154                    |
| Error     |                                                                                                                                                                |                             |

| Effect | Mauchly Sphericity Test (Dataset_29.01)<br>Sigma-restricted parameterization<br>Effective hypothesis decomposition |          |    |          |
|--------|--------------------------------------------------------------------------------------------------------------------|----------|----|----------|
|        | W                                                                                                                  | Chi-Sqr. | df | p        |
| WEIGHT | 0,171723                                                                                                           | 17,12930 | 5  | 0,004261 |

| Effect | Adjusted Univariate Tests for Repeated Measure: DV_1 (Dataset_29.01)<br>Sigma-restricted parameterization<br>Effective hypothesis decomposition |          |          |             |              |              |            |
|--------|-------------------------------------------------------------------------------------------------------------------------------------------------|----------|----------|-------------|--------------|--------------|------------|
|        | Degr. of Freedom                                                                                                                                | F        | p        | G-G Epsilon | G-G Adj. df1 | G-G Adj. df2 | G-G Adj. p |
| WEIGHT | 3                                                                                                                                               | 1,206317 | 0,322732 | 0,541935    | 1,625804     | 17,88384     | 0,313479   |
| Error  | 33                                                                                                                                              |          |          |             |              |              |            |

| Effect | Adjusted Univariate Tests for Repeated Measure: DV_1 (Dataset_29.01)<br>Sigma-restricted parameterization<br>Effective hypothesis decomposition |              |              |            |                  |                   |                   |
|--------|-------------------------------------------------------------------------------------------------------------------------------------------------|--------------|--------------|------------|------------------|-------------------|-------------------|
|        | H-F Epsilon                                                                                                                                     | H-F Adj. df1 | H-F Adj. df2 | H-F Adj. p | Lowr.Bnd Epsilon | Lowr.Bnd Adj. df1 | Lowr.Bnd Adj. df2 |
| WEIGHT | 0,622618                                                                                                                                        | 1,867855     | 20,54641     | 0,316927   | 0,333333         | 1,000000          | 11,00000          |
| Error  |                                                                                                                                                 |              |              |            |                  |                   |                   |



|        |                                                                                                                                           |
|--------|-------------------------------------------------------------------------------------------------------------------------------------------|
| Effect | Adjusted Univariate Tests for Repeated Measure: DV_1 (Dataset_29.01) Sigma-restricted parameterization Effective hypothesis decomposition |
|        | Lowr.Bnd Adj. p                                                                                                                           |
| WEIGHT | 0,295522                                                                                                                                  |
| Error  |                                                                                                                                           |

|           |                                                                                                                                                          |                  |          |          |          |                     |
|-----------|----------------------------------------------------------------------------------------------------------------------------------------------------------|------------------|----------|----------|----------|---------------------|
| Effect    | Repeated Measures Analysis of Variance with Effect Sizes and Powers (Dataset_29.01) Sigma-restricted parameterization Effective hypothesis decomposition |                  |          |          |          |                     |
|           | SS                                                                                                                                                       | Degr. of Freedom | MS       | F        | p        | Partial eta-squared |
| Intercept | 1969,922                                                                                                                                                 | 1                | 1969,922 | 3855,290 | 0,000000 | 0,997155            |
| Error     | 5,621                                                                                                                                                    | 11               | 0,511    |          |          |                     |
| HBA1C     | 0,464                                                                                                                                                    | 3                | 0,155    | 5,189    | 0,004775 | 0,320524            |
| Error     | 0,984                                                                                                                                                    | 33               | 0,030    |          |          |                     |

|           |                                                                                                                                                          |                             |
|-----------|----------------------------------------------------------------------------------------------------------------------------------------------------------|-----------------------------|
| Effect    | Repeated Measures Analysis of Variance with Effect Sizes and Powers (Dataset_29.01) Sigma-restricted parameterization Effective hypothesis decomposition |                             |
|           | Non-centrality                                                                                                                                           | Observed power (alpha=0,05) |
| Intercept | 3855,290                                                                                                                                                 | 1,000000                    |
| Error     |                                                                                                                                                          |                             |
| HBA1C     | 15,567                                                                                                                                                   | 0,891695                    |
| Error     |                                                                                                                                                          |                             |

|          |                                                                                                                        |           |      |   |
|----------|------------------------------------------------------------------------------------------------------------------------|-----------|------|---|
| Cell No. | Tukey HSD test; variable DV_1 (Dataset_29.01) Homogenous Groups, alpha = ,05000 Error: Within MS = ,02980, df = 33,000 |           |      |   |
|          | HBA1C                                                                                                                  | DV_1 Mean | 1    | 2 |
| 4        | V6 HbA1c [%]                                                                                                           | 6,291667  | **** |   |
| 3        | V5 HbA1c [%]                                                                                                           | 6,358333  | **** |   |

|          |                                                                                                                                 |              |      |      |
|----------|---------------------------------------------------------------------------------------------------------------------------------|--------------|------|------|
| Cell No. | Tukey HSD test; variable DV_1<br>(Dataset_29.01)<br>Homogenous Groups, alpha = ,05000<br>Error: Within MS = ,02980, df = 33,000 |              |      |      |
|          | HBA1C                                                                                                                           | DV_1<br>Mean | 1    | 2    |
| 2        | V4 HbA1c [%]                                                                                                                    | 6,416667     | **** | **** |
| 1        | V3 HbA1c [%]                                                                                                                    | 6,558333     |      | **** |

|        |                                                                                                                    |          |    |          |
|--------|--------------------------------------------------------------------------------------------------------------------|----------|----|----------|
| Effect | Mauchly Sphericity Test (Dataset_29.01)<br>Sigma-restricted parameterization<br>Effective hypothesis decomposition |          |    |          |
|        | W                                                                                                                  | Chi-Sqr. | df | p        |
| HBA1C  | 0,543306                                                                                                           | 5,931356 | 5  | 0,312956 |

|           |                                                                                                                                                                |                     |          |          |          |                     |
|-----------|----------------------------------------------------------------------------------------------------------------------------------------------------------------|---------------------|----------|----------|----------|---------------------|
| Effect    | Repeated Measures Analysis of Variance with Effect Sizes and Powers (Dataset_29.01)<br>Sigma-restricted parameterization<br>Effective hypothesis decomposition |                     |          |          |          |                     |
|           | SS                                                                                                                                                             | Degr. of<br>Freedom | MS       | F        | p        | Partial eta-squared |
| Intercept | 103878,7                                                                                                                                                       | 1                   | 103878,7 | 1701,744 | 0,000000 | 0,993578            |
| Error     | 671,5                                                                                                                                                          | 11                  | 61,0     |          |          |                     |
| HBA1CM    | 55,4                                                                                                                                                           | 3                   | 18,5     | 5,189    | 0,004775 | 0,320524            |
| Error     | 117,5                                                                                                                                                          | 33                  | 3,6      |          |          |                     |

|           |                                                                                                                                                                   |                             |
|-----------|-------------------------------------------------------------------------------------------------------------------------------------------------------------------|-----------------------------|
| Effect    | Repeated Measures Analysis of Variance with Effect<br>Sizes and Powers (Dataset_29.01)<br>Sigma-restricted parameterization<br>Effective hypothesis decomposition |                             |
|           | Non-centrality                                                                                                                                                    | Observed power (alpha=0,05) |
| Intercept | 1701,744                                                                                                                                                          | 1,000000                    |
| Error     |                                                                                                                                                                   |                             |
| HBA1CM    | 15,567                                                                                                                                                            | 0,891695                    |
| Error     |                                                                                                                                                                   |                             |

|          |                                                                                                                              |              |      |      |
|----------|------------------------------------------------------------------------------------------------------------------------------|--------------|------|------|
| Cell No. | Tukey HSD test; variable DV_1 (Dataset_29.01)<br>Homogenous Groups, alpha = ,05000<br>Error: Within MS = 3,5606, df = 33,000 |              |      |      |
|          | HBA1CM                                                                                                                       | DV_1<br>Mean | 1    | 2    |
| 4        | V6 HbA1c [mmol/l]                                                                                                            | 45,26792     | **** |      |
| 3        | V5 HbA1c [mmol/l]                                                                                                            | 45,99658     | **** |      |
| 2        | V4 HbA1c [mmol/l]                                                                                                            | 46,63417     | **** | **** |
| 1        | V3 HbA1c [mmol/l]                                                                                                            | 48,18258     |      | **** |

| Effect | Mauchly Sphericity Test (Dataset_29.01)<br>Sigma-restricted parameterization<br>Effective hypothesis decomposition |          |    |          |
|--------|--------------------------------------------------------------------------------------------------------------------|----------|----|----------|
|        | W                                                                                                                  | Chi-Sqr. | df | p        |
| HBA1CM | 0,543306                                                                                                           | 5,931356 | 5  | 0,312956 |

| Effect    | Repeated Measures Analysis of Variance with Effect Sizes and Powers (Dataset_29.01)<br>Sigma-restricted parameterization<br>Effective hypothesis decomposition |                  |         |          |          |                     |
|-----------|----------------------------------------------------------------------------------------------------------------------------------------------------------------|------------------|---------|----------|----------|---------------------|
|           | SS                                                                                                                                                             | Degr. of Freedom | MS      | F        | p        | Partial eta-squared |
| Intercept | 4466007                                                                                                                                                        | 1                | 4466007 | 2487,453 | 0,000000 | 0,995996            |
| Error     | 17954                                                                                                                                                          | 10               | 1795    |          |          |                     |
| FRUCTO    | 1179                                                                                                                                                           | 3                | 393     | 2,254    | 0,102467 | 0,183918            |
| Error     | 5230                                                                                                                                                           | 30               | 174     |          |          |                     |

| Effect    | Repeated Measures Analysis of Variance with Effect Sizes and Powers (Dataset_29.01)<br>Sigma-restricted parameterization<br>Effective hypothesis decomposition |                             |
|-----------|----------------------------------------------------------------------------------------------------------------------------------------------------------------|-----------------------------|
|           | Non-centrality                                                                                                                                                 | Observed power (alpha=0,05) |
| Intercept | 2487,453                                                                                                                                                       | 1,000000                    |
| Error     |                                                                                                                                                                |                             |
| FRUCTO    | 6,761                                                                                                                                                          | 0,513658                    |
| Error     |                                                                                                                                                                |                             |

| Effect | Mauchly Sphericity Test (Dataset_29.01)<br>Sigma-restricted parameterization<br>Effective hypothesis decomposition |          |    |          |
|--------|--------------------------------------------------------------------------------------------------------------------|----------|----|----------|
|        | W                                                                                                                  | Chi-Sqr. | df | p        |
| FRUCTO | 0,431745                                                                                                           | 7,325976 | 5  | 0,197504 |
